1

2

### 3 **Land Use Change and Coronavirus Emergence Risk**

4 Maria Cristina Rulli<sup>1\*</sup>, Paolo D’Odorico<sup>2\*</sup>, Nikolas Galli<sup>1</sup>, and David T.S. Hayman<sup>3</sup>

5 <sup>1</sup> Department of Civil and Environmental Engineering, Politecnico di Milano, Piazza Leonardo da  
6 Vinci, 20133 Milano, Italy.

7 <sup>2</sup> Department of Environmental Science, Policy, and Management, University of California,  
8 Berkeley, California, USA.

9 <sup>3</sup> Molecular Epidemiology and Public Health Laboratory, School of Veterinary Science, Massey  
10 University, New Zealand.

11 \* Maria Cristina Rulli **Email:** [mariacristina.rulli@polimi.it](mailto:mariacristina.rulli@polimi.it)

12 \* Paolo D’Odorico **Email:** [paolododo@berkeley.edu](mailto:paolododo@berkeley.edu)

13

#### 14 **Sentence summarizing manuscript**

15 Wildlife reservoirs for SARS-coronavirus-2 live in global hotspots of forest fragmentation, livestock, and  
16 human density in China

#### 17 **Classification**

18 APPLIED ECOLOGY

19 ENVIRONMENTAL STUDIES

#### 20 **Keywords**

21 COVID19, Land Use Change, One Health, Livestock, Wildlife

22

#### 23 **This PDF file includes:**

24 Main text

25 Figures 1 to 4

26 Supporting information (SI) Tables 1 to 3, Figure 1 to 8

27

28 **Abstract**

29 Coronavirus disease 2019 (COVID-19) and severe acute respiratory syndrome (SARS) causing  
30 coronaviruses are mostly discovered in Asian horseshoe bats. It is still unclear how ongoing land  
31 use changes may facilitate SARS-related coronavirus transmission to humans. Here we use a  
32 multivariate hotspot analysis of high-resolution land-use data to show that regions of China  
33 populated by horseshoe bats are hotspots of forest fragmentation, livestock and human density.  
34 We also identify areas susceptible to new hotspot emergence in response to moderate expansion  
35 of urbanization, livestock production, or forest disturbance, thereby highlighting regions  
36 vulnerable to SARS-CoV spillover under future land-use change. In China population growth and  
37 increasing meat consumption associated with urbanization and economic development have  
38 expanded the footprint of agriculture, leading to human encroachment in wildlife habitat and  
39 increased livestock density in areas adjacent to fragmented forests. The reduced distance  
40 between horseshoe-bats and humans elevates the risk for SARS-related coronavirus transmission  
41 to humans.

42 **Introduction**

43 The ongoing severe acute respiratory syndrome coronavirus-2 (SARS-CoV-2) pandemic is claiming  
44 human lives and disrupting the functioning of human societies in unprecedented ways. Where did  
45 this virus come from and how did it transmit to humans? What facilitated such a host shift and  
46 how can we prevent this from happening again? These are important questions, in addition to the  
47 most outstanding ones about whether, when, and how this pandemic will end.

48 Recent years have seen a rise in the recorded number of epidemics from emerging diseases. Such  
49 epidemics constitute a major public health threat because of our limited knowledge of prevention  
50 and treatment therapies. Most emerging infectious diseases originate from pathogen spillovers  
51 from wildlife to humans (1). Why are such outbreaks increasing? Does environmental change play  
52 a role?

53 Crucial to understanding the emergence of infectious diseases is the analysis of the factors  
54 facilitating the spillover from wildlife prior to further spread within human populations (2,3). In  
55 the case of SARS-CoV-2 genomic sequencing has shown that the virus is most closely related  
56 (~96%) to a strain present in horseshoe bats (4). It is still unclear whether the spillover of SARS-  
57 CoV-2 occurred directly from bats to humans or through an intermediate species. For instance, a  
58 strain of coronavirus very similar to SARS-CoV-2 was detected in Malayan Pangolin (*Manis  
59 javanica*) (5), a wild mammal that is frequently illegally smuggled from Southeast Asia into China  
60 and sold in markets (5). Regardless of the specific pathway, the pathogen flow of emerging  
61 zoonotic diseases to humans is the result of human interactions with wildlife. We argue that the  
62 increasing incidence of emerging disease outbreaks is the result of a similar set of drivers able to  
63 change the distance and contact rates between wildlife and humans (as well as human-human  
64 interaction), including population growth, urbanization, increasing affluence in mid-income  
65 countries, and the associated dietary shifts (6). As countries become more affluent demand for  
66 animal products increases, leading to an expansion of agriculture and animal husbandry, often at  
67 the expense of natural ecosystems (7). Human penetration in wildlife habitat favors the  
68 interaction between humans and wildlife species, either directly through activities like hunting or  
69 through other species, particularly livestock that are in closer contact with humans (8-11). The  
70 establishment of pastures, plantations or concentrated livestock farms close to forest margins  
71 may increase pathogen flows from wildlife to humans (2,9,11-14). Indeed, deforestation and

72 forest fragmentation themselves reshape the dynamics of wildlife communities, possibly leading  
73 to the extinction of habitat specialist species, while allowing generalists to thrive (15).

74 While several reports in the media have conjectured on a possible link between land use change  
75 and the emergence of the COVID19 pandemic, such a hypothesis still has to be supported by a  
76 comprehensive high-resolution analysis of land use patterns that combines forest fragmentation  
77 to livestock and human encroachment in wildlife habitat (2). Here we analyze environmental  
78 changes to explain why China remains at risk for other SARS-related coronavirus outbreaks (1,2).  
79 We analyze a set of factors that could make China a suitable location for the spillover to humans  
80 to occur. To that end, while we do not specifically link environmental change or bats as the  
81 immediate hosts of the SARS-CoV-2 ancestor (4,5), we use horseshoe bats in the genus  
82 *Rhinolophus* (family Rhinolophidae) as a model system to understand the risk of future  
83 coronavirus outbreaks because China is reported to be a region with both highly diverse  
84 horseshoe bats and bat SARS-like CoV (16-18).

## 85 **Results**

86 Among the four CoV genera, two (alpha- and betacoronaviruses) are found in bats. Among the  
87 betacoronaviruses, all four subgenera have been discovered in bats, including the SARS-related  
88 CoVs (SARSr-CoV, subgenera *Sarbecovirus*) (16-18). Both SARS-CoV-1 and Swine acute diarrhoea  
89 syndrome coronavirus (SADS-CoV) emerged in southeast China and were later detected in  
90 horseshoe bats, mainly *Rhinolophus sinicus* and *Rhinolophus affinis* (4,16-18). Most SARSr-CoVs  
91 are detected in horseshoe bats, although some strains have been detected in other genera. SARSr-  
92 CoVs in China are most similar to the highly pathogenic human SARS-CoVs (4,16-18). Therefore,  
93 we performed our local analyses of disturbance at bat locations to horseshoe bats in China (Fig  
94 1a; Table S1) and our analyses of disturbance within horseshoe bat distributions in both the larger  
95 South, East, and South East Asia region and then China.

96 Within these distributions we generated 10000 random sampling points (Fig 1a, see SI). Within  
97 30km from every random sampling point we calculate livestock density ( $n/km^2$ ), forest cover and  
98 fragmentation, cropland cover, population density, and the fractional cover of human settlements  
99 (see Supplementary Materials) (14). Hotspots were calculated (Fig 1a) using the Getis-Ord  
100 algorithm to show the areas with high or low values of land use attributes cluster (Fig 2).

101 China exhibits a relatively high concentration of livestock production in horseshoe bat  
102 distributions (Fig 1a, Table S1). Indeed, China is a hotspot of livestock density within this region  
103 (Fig 1b), with statistically significant higher concentrations of chickens, ducks, pigs, goats and  
104 cattle (Fig 2a). Within a 30km radius from observed bat locations the density of chicken, ducks,  
105 pigs, goats, and cattle was again significantly greater than randomly selected locations.  
106 Conversely the sheep density is lower in China, though sheep density was low overall, as it was  
107 for other ruminants. The density of chickens, pigs, goats and cattle surrounding (<30km) the  
108 points where these bats were recorded and at the randomly selected locations in China within  
109 the suitability region were not significantly different, indicating that these random locations have  
110 livestock densities that are representative of the areas in which the actual presence of horseshoe  
111 bats has been documented.

112 Forest cover and fragmentation have been related to virus outbreaks from wildlife (including bats)  
113 for other zoonotic diseases such as Ebola virus disease (14). China exhibits on average lower forest  
114 cover and cropland density and greater forest fragmentation than the other regions analyzed (Fig

115 1c). The average forest cover and forest fragmentation in the surroundings (within 30km distance)  
116 of random points selected in China and the other regions (Figs 1a, 2b) show that these differences  
117 are statistically significant. Likewise, statistically significant differences (i.e. lower average cover  
118 and higher average fragmentation) are found between the points of actual observations of  
119 horseshoe bats and randomly selected locations in the regions outside China within the  
120 distributions of these bats (Fig 2b).

121 China also exhibits higher levels of human presence in horseshoe bat distributions, as evidenced  
122 by population density and the fraction of the landscape covered by villages, towns, and other  
123 human settlement (Fig 2c). Indeed, the region of China suitable for horseshoe bats coincides with  
124 hotspots of human settlements (Fig 1d). Collectively, these results demonstrate that China  
125 exhibits stronger signs of human encroachment, livestock density, and forest disturbance of  
126 SARSr-CoV hosting horseshoe bat distributions than other regions. In China, regions close to forest  
127 fragments are more densely used for livestock production and human settlements – and  
128 consequently exhibit lower forest and cropland cover (Fig 1b) – thereby favoring the contact  
129 between wildlife and humans either directly or through intermediate animals such as livestock.  
130 The fact that China is a global hotspot in the concurrence of these three factors (fragmentation,  
131 livestock density, and human settlement) is highlighted by the multivariate hotspot analysis (Fig.  
132 3). These three attributes account for bat habitat (fragmentation), livestock, and human presence,  
133 which are major factors contributing to the spillover of zoonotic infectious diseases. Interestingly,  
134 we find that China is the global hotspot of simultaneously high forest fragmentation, livestock  
135 density and human settlement. The other major global hotspots outside China are found in Java,  
136 Bhutan, east Nepal, northern Bangladesh, the Kerala state of India and North-East India, the latter  
137 of which are known for past outbreaks of Nipah virus, another bat-related zoonotic disease (19).

138 We then use the multivariate hotspot framework to identify regions at high potential risk of  
139 SARSr-CoVs spillovers to humans as a result of land use change. To that end the results of the  
140 multivariate hotspot analysis were clustered in 30 groups, based on geographic contiguity and  
141 similarity in the above three attributes (Fig. 4a; Table S3). We then perturbed one attribute at a  
142 time in each group to evaluate that group's susceptibility to transitioning from non-significant  
143 conditions (Fig. 3) to a hotspot state (Fig. 4b). This sensitivity analysis (Fig 4b) shows areas at risk  
144 of transitioning to hotspots as a result of a future increase in at least one of the analyzed attributes  
145 (i.e. forest fragmentation, livestock density, or human settlement). Interestingly the Chinese  
146 region south of Shanghai is at high risk of potentially turning into a hotspot as a result of  
147 fragmentation increase. Other regions susceptible to hotspot transition as a result of forest  
148 fragmentation include Japan and north Philippines. Likewise, the transition region between  
149 China's hotspot and Indochina's coldspot and the region surrounding the hotspot of Thailand  
150 could turn into hotspots for SARSr-CoV spillover as a result of increasing presence of livestock or  
151 humans, respectively (Fig. 4b). These results point both to regions of the world currently suitable  
152 for SARSr-CoV spillover from wildlife to humans as well as those at risk of becoming prone to  
153 spillover as a result of trajectories of land use change and human penetration (Fig. 4c; Fig.S8 SI)

154

## 155 **Discussion**

156 Our approach uses the horseshoe bats as a model family because of their key role as hosts of  
157 *Sarbecovirus* coronaviruses, which have caused SARS, COVID-19, and SADS (4,13-18). Other

158 strains of related viruses have been found in other bat genera, but these relationships are less  
159 clear (16-18). The widespread sampling of other bats may find species-specific relationships,  
160 though horseshoe bats appear to be the reservoirs where most SARSr-CoVs have their  
161 evolutionary ancestors so we assume they are the most appropriate model. The risk to humans  
162 from other coronaviruses, therefore, will be different, because their host distributions are  
163 different, and two CoV genera (gamma- and delta-coronaviruses) are mostly bird viruses.

164 The bat location data and species distribution data also suffer from different, but related issues.  
165 The bat location data are presence only data. True absence data are difficult to obtain, therefore  
166 we randomly sampled within different locations to generate pseudo-absence data. Choosing  
167 where to sample from also present difficulties, so we chose horseshoe bat distribution data for  
168 species that existed within China, East Asia, South, and South East Asia. This presents further  
169 issues as the distribution of one species, the greater horseshoe bat (*Rhinolophus ferrumequinum*),  
170 extends from Western Europe, Northern Africa, Central Asia and Eastern Asia. We therefore  
171 weighted our sampling based on the number of overlapping species distributions to account for  
172 this. However, these species distributions are large polygons and the realized niches used within  
173 them by the species likely differ, so better niche models using presence and, ideally,  
174 presence/absence data are required to develop better species presence predictions (20).  
175 However, our results for random locations in China and outside China and reported bat  
176 observations were comparable.

177 More generally, though using the relatively specific bat and virus relationships, we took a high-  
178 level approach to understand the more distal or ultimate (rather than proximal) causes of  
179 infectious disease emergence in China, linking environmental change and human drivers like  
180 agricultural intensification. Different infectious diseases have different transmission mechanisms  
181 and life cycles, and not all will respond to such changes in the same way. For example, directly  
182 transmitted, acute infections with short incubation and infectious periods, like SARSr-CoVs, will  
183 likely be dependent on hosts having greater densities, like in China, for them to emerge. The  
184 epidemic potential is then also increased through local and global movement and trade, either of  
185 people, wildlife, or livestock (8,21-23). Along with the biological properties of the virus and hosts,  
186 the true risk of both the initial cross-species transmission and epidemic potential is either  
187 increased or limited by more proximal mechanisms, such as biosecurity, health and safety  
188 measures (e.g. personal protective equipment, meat hygiene) that can reduce risk, even if the  
189 ultimate factors are present and increasing through the processes of habitat fragmentation and  
190 human encroachment (8,14).

191 Spillover of infectious disease such as SARS, COVID-19 and SADS from wildlife to humans likely  
192 requires the coexistence of horseshoe bats and humans in the same environment and is favored  
193 by the presence of intermediate animal species, particularly livestock because it is in closer  
194 contact with humans. The fragmentation and disturbance of forest ecosystems likely favors  
195 habitat generalist bat species. In particular, chickens, ducks, and pigs have been associated with  
196 the spread of several zoonotic viral infections, such as influenza viruses. This study demonstrates  
197 that in China these important factors responsible for reducing the distance between wildlife and  
198 humans co-occur both in horseshoe bat distributions and in the surroundings of actual  
199 documented bat occurrence. These results are consistent with the notion that population growth  
200 and increasing meat consumption associated with urbanization and economic growth have  
201 expanded the footprint of agriculture, leading to human encroachment in wildlife habitat and  
202 increased livestock density in areas adjacent to fragmented forest patches. China has dramatically

203 increased animal consumption (24), likely as the result of increasing affluence. In China, meat  
204 supply is largely reliant on domestic production using imported feed (e.g. soy from the Americas)  
205 (24), which explains the high livestock density in many rural areas, including those at the forest  
206 margins. Likewise, economic growth and the shift to diets richer in animal products explains the  
207 increasing demand for wild animal meat delicacies, increasing human-wildlife interactions  
208 through multiple pathways and the disturbance of forest habitat in more remote locations –  
209 frequently abroad – through trade-related teleconnections (25).

210 The multivariate hotspot analysis highlights how China is the largest hotspot for the concurrence  
211 of high forest fragmentation, livestock density, and human presence in our analysis (Fig. 3). The  
212 sensitivity analyses identifying the possible transition to new hotspots in response to an increase  
213 in one of these attributes (Fig. 4b) highlights areas that could become suitable for spillover and  
214 the type of land use change that could induce hotspot activation. Therefore, this analysis  
215 highlights region-specific targeted interventions that are urgently needed to increase resilience  
216 to SARSr-CoV spillovers. For instance, the green dots in Fig. 4 could be turned into hotspots as a  
217 result of forest fragmentation. In these regions resilience can be built through forest conservation  
218 or restoration efforts. Indeed, land use change evaluations should consider the risk of activating  
219 new hotspots suitable for wildlife-to-human spillover of pathogens such as SARSr-CoV, an aspect  
220 that has seldom been included in the impact analysis of land use change. Likewise, other regions  
221 such as the China-Indochina transition zone or central Thailand are prone to hotspot transitioning  
222 as a result of increased livestock density of urbanization, respectively. In these cases, mitigation  
223 of SARSr-CoV emergence can be enhanced by reducing livestock or human density,  
224 respectively, thereby inverting ongoing dietary and urbanization trends. Thus, environmental  
225 health, is tightly connected to both animal and human health, as recently stressed by planetary  
226 and ‘one health’ discourses, which advocate for more holistic views of global health,  
227 encompassing environment, animals, and people as well as their interactions (26).

## 228 **Materials and Methods**

229

### 230 *Bat location data*

231 Most SARS-related CoVs are detected in horseshoe bats, although some strains have also been  
232 detected in other genera (22,27-33). SARSr-CoVs in China are most similar to the highly  
233 pathogenic human SARS-CoVs (34-36).

234 We restricted our local analyses of disturbance at bat locations to Rhinolophid bats in China. We  
235 performed a Web of Science® search on 10/04/2020 using the following Boolean Operators:  
236 Rhinoloph\* AND China AND Monitor\* OR Survey OR Niche OR Distribution. We found 129 unique  
237 references. We removed all those published before 2000, reporting data outside China, review  
238 articles, and non-English (specifically 23 Chinese language publication), those with no Rhinolophid  
239 data, and those reporting only fossil records. We kept infection studies. This left 48 publications.  
240 We then further manually reviewed the publications for those reporting location data (22) but  
241 more specifically those with latitude and longitude, leaving 17 publications and 264 observations  
242 (see Fig. 1a; Table S1).

### 243 *Bat distribution data*

244 We restricted our analyses of disturbance in bat distributions to Rhinolophid bats in both the  
245 larger South, East and South East Asia region (but see main manuscript) and then China. We  
246 searched the IUCN Red List database (<https://www.iucnredlist.org/search>) using Taxonomy:

247 Rhinolophidae and Region: East Asia and South & South East Asia (herein 'regional') followed by  
248 Taxonomy: Rhinolophidae and Region: East Asia: China, Hong Kong & Taiwan (herein 'Chinese')  
249 classifications and downloaded the shapefiles for the 55 regional and 22 Chinese Rhinolophus  
250 species present in the region. We consider these areas as regions of suitable habitat for  
251 Rhinolophidae. The extent of this study area exceeds 28.5 million km<sup>2</sup>.

252 Within these putative species distributions, we generated 10000 random sampling points with a  
253 local sampling density that is proportional to the number of species whose distributions were  
254 reported at the point. For every random sampling point we consider a circular area of 30km radius  
255 within which we calculate livestock density, forest cover and fragmentation, cropland cover,  
256 population density and the fractional cover of human settlements as explained below. The  
257 average values of these statistics are then calculated for China and the other regions of the world  
258 with habitat suitable for Rhinolophidae and compared and the difference is tested for significance  
259 using the Mann-Whitney non-parametric test in Mathematica®.

#### 260 *Livestock, forest cover, and population data*

261 We took livestock data from the GeoWiki database that provides georeferenced livestock counts  
262 (in heads/km<sup>2</sup>) at 1 km resolution for chickens, ducks, pigs, goats, sheep, and cattle  
263 (<https://livestock.geo-wiki.org/home-2/>). We quantified human presence both in terms of  
264 population density at 1 km resolution and as fraction of the landscape taken by villages, towns or  
265 other settlements from the WorldPop database at 1 km resolution. We used cropland data (at  
266 30x30m<sup>2</sup> resolution) from (37). Forest cover data are available at 30m resolution annually  
267 between 2000 and 2018 (38). Forest cover is associated with the presence of trees taller than 5  
268 m. Forest loss or gain was determined as the difference in forest cover between these two years.

#### 269 *Forest fragmentation analyses*

270 We performed a forest fragmentation analyses based on Vogt et al. (39) using the 30m forest  
271 cover data. This method distinguishes forest cores, from forest margins and patches. Every 30m  
272 pixel is classified as wooded or non-wooded, based on whether its tree cover was greater or  
273 smaller than 50% in the year 2018. Forest cores are wooded pixels that are not adjacent to non-  
274 wooded pixels. Conversely, forest patches are made of wooded pixels that are not adjacent to  
275 forest core pixels. Wooded pixels that are neither core nor patch pixels occur at the margins of  
276 forest cores. Forest fragmentation was then quantified in terms of a composite fragmentation  
277 index (CFI) (13), defined as the ratio between the sum of number of pixels classified as "margins",  
278 "patches", or smaller core areas (i.e., <200 ha), and the total number of pixels (wooded + non-  
279 wooded) in the 30km circles used to characterize land cover and land use in the surroundings of  
280 the points of actual bat observations or the randomly generated points. This index ranges  
281 between 0 and 1.

#### 282 *Hotspot Analyses and multivariate clustering*

283 We mapped statistically significant hotspots of livestock density, forest fragmentation, and  
284 human settlements. To be a hotspot, an area needs to have a high (or low, in the case of cold-  
285 spots) value of its attribute and be also surrounded by other areas with high (or low) values of the  
286 same attribute. To that end, the 30km circles centered on the 10000 random points (Fig. 1a)  
287 considered in this study were used to carry out a hotspot analysis applying the Getis-Ord  
288 algorithm (Gi\* statistics). The Gi\* statistic shows to what extent areas with high or low values tend

289 to cluster thereby forming a hotspot. The result of the  $G_i^*$  analysis is reported in terms of  
290 statistically significance with 90%, 95%, and 99% confidence (Fig. 1).

291 We then used two different methods to generate a multivariate distribution for the three  
292 indicators (livestock density, forest fragmentation and human settlements). First, we averaged  
293 their  $G_i^*$ . Since the  $G_i^*$  is a z-score, i.e. it has a standard normal distribution, a linear combination  
294 of the three  $G_i^*$  indicators, such as their average, is a standard normal distribution and can still  
295 be represented with the same significance levels (Fig. 2). Second, we performed a spatially  
296 constrained multivariate clustering analysis. A Minimum Spanning Tree (MST) from the  
297 connectivity graph of the features was built, and then the SKATER (Spatial “K”luster Analysis by  
298 Tree Edge Removal) clustering method was used (40). The SKATER iteratively cuts branches in the  
299 MST, based on data variability among and within groups and on a spatial constraint, until it  
300 reaches the user-defined number of groups. The spatial constraint defined here is a k nearest  
301 neighbors type with 8 neighbors, meaning each feature in a group must have at least one of its 8  
302 nearest neighbors in the same group. We chose 30 as the number of groups, calculated a set of  
303 summary statistics and boxplots for the groups and compared them to their global values (Table  
304 S2). For each indicator, we calculated the  $R^2$  value as the reduction in variance of the indicator  
305 obtained by grouping, divided by the original variance of the indicator (Table S2). While the  
306 modularity analysis based on pseudo F-statistics shows that the optimal number of groups (the  
307 maximum differences between groups while maximizing within group similarity) is 12, here we  
308 studied 30 groups to analyse distinct regional patterns. Having a greater number of groups allows  
309 us to identify groups that are susceptible to transitioning to a hotspot because they are not “too  
310 different” from hotspots.

311

312

### 313 **Acknowledgments**

314 M.C.R and N.G. are supported by Cariplo Foundation (SusFeed project 0737 CUP  
315 D49H170000300007). D.T.H. is supported by USDA Hatch Multistate project no. W4190 capacity  
316 fund; Rutherford Discovery Fellowship RDF-MAU1701.

317 **Competing interest statement:** The authors declare no competing interests.

318 **Author contributions:** M.C.R. designed research; M.C.R. and D.T.S.H performed research;  
319 M.C.R., P.D. and N.G. analyzed data; P.D., M.C.R. and D.T.S.H wrote the paper.

320



321 **References**

- 322 1 K. E. Jones, N. G. Patel, M. A. Levy, A. Storeygard, D. Balk, J. L. Gittleman, P. Daszak, Global  
 323 trends in emerging infectious diseases. *Nature* **451**, 990-993 (2008).
- 324 2 T. Allen, K. Murray, C. Zambrana-Torrel, S. S. Morse, C. Rondinini, M. Di Marco, N. Brerit,  
 325 K. J. Olival, P. Daszak, Global hotspots and correlates of emerging zoonotic diseases,  
 326 *Nature Communications*, **8**: 1124, DOI: 10.1038/s41467-017-00923-8 (2017).
- 327 3 T. Wu C. Perrings, A. Kinzig, J. P. Collins, B. A. Minter, P. Daszak, Economic growth,  
 328 urbanization, globalization, and the risks of emerging infectious diseases in China: A  
 329 review, *Ambio*, **46**:18–29.
- 330 4 Peng Zhou, Xing-Lou Yang, Xian-Guang Wang, Ben Hu, Lei Zhang, Wei Zhang, Hao-Rui Si,  
 331 Yan Zhu, Bei Li, Chao-Lin Huang, Hui-Dong Chen, Jing Chen, Yun Luo, Hua Guo, Ren-Di  
 332 Jiang, Mei-Qin Liu, Ying Chen, Xu-Rui Shen, Xi Wang, Xiao-Shuang Zheng, Kai Zhao, Quan-  
 333 Jiao Chen, Fei Deng, Lin-Lin Liu, Bing Yan, Fa-Xian Zhan, Yan-Yi Wang, Geng-Fu Xiao &  
 334 Zheng-Li Shi, A pneumonia outbreak associated with a new coronavirus of probable bat  
 335 origin. *Nature* **579**, 270-273, (2020).
- 336 5 Tommy Tsan-Yuk Lam, Na Jia, Ya-Wei Zhang, Marcus Ho-Hin Shum, Jia-Fu Jiang, Hua-Chen  
 337 Zhu, Yi-Gang Tong, Yong-Xia Shi, Xue-Bing Ni, Yun-Shi Liao, Wen-Juan Li, Bao-Gui Jiang,  
 338 Wei Wei, Ting-Ting Yuan, Kui Zheng, Xiao-Ming Cui, Jie Li, Guang-Qian Pei, Xin Qiang,  
 339 William Yiu-Man Cheung, Lian-Feng Li, Fang-Fang Sun, Si Qin, Ji-Cheng Huang, Gabriel M.  
 340 Leung, Edward C. Holmes, Yan-Ling Hu, Yi Guan & Wu-Chun Cao, Identifying SARS-CoV-2  
 341 related coronaviruses in Malayan pangolins. *Nature*, (2020).
- 342 6 D. Tilman & M. Clark, Global diets link environmental sustainability and human health.  
 343 *Nature* **515**, 518-522 (2014).
- 344 7 R. Naylor, Expanding the boundaries of agricultural development. *Food Security* **3**, 233  
 345 (2011).
- 346 8 D. A. Wilkinson, J. C. Marshall, N. P. French, D. T. Hayman, Habitat fragmentation,  
 347 biodiversity loss and the risk of novel infectious disease emergence. *Journal of the Royal*  
 348 *Society Interface* **15**, 20180403 (2018).
- 349 9 C. K. Johnson, P. L. Hitchens, P. S. Pandit, J. Rushmore, T. S. Evans, C. C. W. Young, M. M.  
 350 Doyle, Global shifts in mammalian population trends reveal key predictors of virus  
 351 spillover risk. *Proceedings of the Royal Society B* **287** (2020).
- 352 10 L. S. P. Bloomfield, T. L. McIntosh, E. F. Lambin, Habitat fragmentation, livelihood  
 353 behaviors, and contact between people and nonhuman primates in Africa. *Landscape*  
 354 *Ecology* **35**, 985-1000, doi:10.1007/s10980-020-00995-w (2020).
- 355 11 J. R. C. Pulliam, J. H. Epstein, J. Dushoff, S. A. Rahman, M. Bunning, A. A. Jamaluddin, A. D.  
 356 Hyatt, H. E. Field, A. P. Dobson, P. Daszak, the Henipavirus Ecology Research Group  
 357 (HERG), Agricultural intensification, priming for persistence and the emergence of Nipah  
 358 virus: a lethal bat-borne zoonosis. *Journal of the Royal Society Interface* **9**, 89-101 (2012).
- 359 12 K. B. Chua, K. J. Goh, K. T. Wong, A. Kamarulzaman, P. S. Tan, T. G. Ksiazek, S. R. Zaki, G.  
 360 Paul, S. K. Lam, C. T. Tan, Fatal encephalitis due to Nipah virus among pig-farmers in  
 361 Malaysia. *The Lancet* **354**, 1257-1259 (1999).
- 362 13 Peng Zhou, Hang Fan, Tian Lan, Xing-Lou Yang, Wei-Feng Shi, Wei Zhang, Yan Zhu, Ya-Wei  
 363 Zhang, Qing-Mei Xie, Shailendra Mani, Xiao-Shuang Zheng, Bei Li, Jin-Man Li, Hua Guo,  
 364 Guang-Qian Pei, Xiao-Ping An, Jun-Wei Chen, Ling Zhou, Kai-Jie Mai, Zi-Xian Wu, Di Li,  
 365 Danielle E. Anderson, Li-Biao Zhang, Shi-Yue Li, Zhi-Qiang Mi, Tong-Tong He, Feng Cong,  
 366 Peng-Ju Guo, Ren Huang, Yun Luo, Xiang-Ling Liu, Jing Chen, Yong Huang, Qiang Sun,

367 Xiang-Li-Lan Zhang, Yuan-Yuan Wang, Shao-Zhen Xing, Yan-Shan Chen, Yuan Sun, Juan Li,  
368 Peter Daszak, Lin-Fa Wang, Zheng-Li Shi, Yi-Gang Tong, Jing-Yun, Fatal swine acute  
369 diarrhoea syndrome caused by an HKU2-related coronavirus of bat origin. *Nature* **5556**,  
370 255-258(2018).

371 14 M. C. Rulli, M. Santini, D. T. Hayman, P. D’Odorico, The nexus between forest  
372 fragmentation in Africa and Ebola virus disease outbreaks. *Scientific reports* **7**, 41613  
373 (2017).

374 15 C. F. Meyer, M. J. Struebig, M. R. Willig, in *Bats in the anthropocene: Conservation of bats*  
375 *in a changing world* 63-103 (Springer, Cham, 2016).

376 16 J. Cui, F. Li, Z. Shi, Origin and evolution of pathogenic coronaviruses. *Nature Reviews:*  
377 *Microbiology* **17**, 181-192(2019).

378 17 Y. Fan, K. Zhao, Z. Shi, P. Zhou, Bat coronaviruses in China. *Viruses* **11**, 1-11, (2019).

379 18 A. C. P. Wong, X. Li, S. K. P. Lau, P. C. Y. Woo, Global epidemiology of bat coronaviruses.  
380 *Viruses* **11**, doi:10.3390/v11020174 (2019).

381 19 V. Soman Pillai, G. Krishna, M. Valiya Veettil, Nipah Virus: Past Outbreaks and Future  
382 Containment. *Viruses*. **12**(4):465 (2020).

383 20 W. Thuiller, B. Lafourcade, R. Engler, M. B. Araújo, BIOMOD—a platform for ensemble  
384 forecasting of species distributions. *Ecography* **32**, 369-373 (2009).

385 21 M. Chinazzi, J. T. Davis, M. Ajelli, C. Giovannini, M. Litvinova, S. Merler, A. Pastore y Piontti,  
386 K. Mu, L. Rossi, K. Sun, C. Viboud, X. Xiong, H. Yu, M. E. Halloran, I. M. Longini Jr., A.  
387 Vespignani, The effect of travel restrictions on the spread of the 2019 novel coronavirus  
388 (COVID-19) outbreak. *Science* **368**, 395-400 (2020).

389 22 M. U. G. Kramer, C. Yang, B. Gutierrez, C. Wu, B. Klein, D. M. Pigott, Open COVID-19 Data  
390 Working Group, L. du Plessis, N. R. Faria, R. Li, W. P. Hanage, J. S. Brownstein, M. La, J. S.  
391 Brownstein, M. Layan, A. Vespignani, H. Tian, C. Dye, O. G. Pybus, S. V. Scarpino, The effect  
392 of human mobility and control measures on the COVID-19 epidemic in China. *Science* **368**,  
393 493-497 (2020).

394 23 Q. Yang, X. Zhao, P. Lemey, M. A. Suchard, Y. Bi, W. Shi, D. Liu, W. Qi, G. Zhang, N. C.  
395 Stenseth, G. Pybus, H. Tian, Assessing the role of live poultry trade in community-  
396 structured transmission of avian influenza in China. *Proceedings of the National Academy*  
397 *of Sciences* **117**, 5949-5954 (2020).

398 24 P. D’Odorico, K. F. Davis, L. Rosa, J. A. Carr, D. Chiarelli, J. Dell’Angelo, J. Gephart, G. K.  
399 MacDonald, D. A. Seekell, S. Suweis, M. C. Rulli, The global food-energy-water nexus.  
400 *Reviews of Geophysics*, **56**, 456–531 (2018).

401 25 P. Meyfroidt, E. F. Lambin, K. H. Erb, T. W. Hertel, Globalization of land use: Distant drivers  
402 of land change and geographic displacement of land use. *Current Opinion in*  
403 *Environmental Sustainability*, **5**(5), 438–444 (2013).

404 26 S. Whitmee, A. Haines, C. Beyrer, F. Boltz, A. G. Capon, B. Ferreira de Souza Dias, A. Ezeh,  
405 H. Frumkin, P. Gong, P. Head, R. Horton, G. M. Mace, R. Marten, S. S Myers, S. Nishtar, S.  
406 A. Osofsky, S. K. Pattanayak, M. J. Pongsiri, C. Romanelli, A. Soucat, J. Vega, D. Yach,  
407 Safeguarding human health in the Anthropocene epoch: report of The Rockefeller  
408 Foundation–Lancet Commission on planetary health. *The Lancet* **386**, 1973-2028 (2015).

409 27 P. C. Y. Woo, S. K. P. Lau, C. S. F. Lam, C. C. Y. Lau, A. K. L. Tsang, J. H. N. Lau, R. Bai, J. L. L.  
410 Teng, C. C. C. Tsang, M. Wang, B. J. Zheng, K. H. Chan, K. Y. Yuen, Discovery of seven novel  
411 Mammalian and avian coronaviruses in the genus deltacoronavirus supports bat  
412 coronaviruses as the gene source of alphacoronavirus and betacoronavirus and avian

413 coronaviruses as the gene source of gammacoronavirus and deltacoronavirus. *J. Virol.*,  
414 **86**, 3995–4008, (2012).

415 28 V. M. Corman, N. L. Ithete, L. R. Richards, M. C. Schoeman, W. Preiser, C. Drosten, J. F.  
416 Drexler, Rooting the Phylogenetic Tree of Middle East Respiratory Syndrome Coronavirus  
417 by Characterization of a Conspecific Virus from an African Bat. *J. Virol.*, **88**, 11297–11303,  
418 (2014).

419 29 ICTV 2018: Cornidovirineae. Available online:  
420 [https://talk.ictvonline.org/taxonomy/p/taxonomy-history?taxnode\\_id=20186105](https://talk.ictvonline.org/taxonomy/p/taxonomy-history?taxnode_id=20186105)  
421 (2018).

422 30 C. Huang, W. J. Liu, W. Xu, T. Jin, Y. Zhao, J. Song, Y. Shi, W. Ji, H. Jia, Y. Zhou, H. Wen, H.  
423 Zhao, H. Liu, H. Li, Q. Wang, Y. Wu, L. Wang, D. Liu, G. Liu, H. Yu, E. C. Holmes, L. Lu, G. F.  
424 Gao, A Bat-Derived Putative Cross-Family Recombinant Coronavirus with a Reovirus  
425 Gene. *PLoS Pathog*, **12**, e1005883 (2016).

426 31 P. C. Woo, M. Wang, S. K. Lau, H. Xu, R. W. Poon, R. Guo, B. H. Wong, K. Gao, H. W. Tsoi,  
427 Y. Huang, K. S. Li, C. S. Lam, K. H. Chan, B. J. Zheng, K. Y. Yuen, Comparative analysis of  
428 twelve genomes of three novel group 2c and group 2d coronaviruses reveals unique group  
429 and subgroup features. *J. Virol.*, **81**, 1574–1585, (2007).

430 32 S. K. P. Lau, L. Zhang, H. K. H. Luk, L. Xiong, X. Peng, K. S. M. Li, X. He, P. S. Zhao, R. Y. Y.  
431 Fan, A. C. P. Wong, S.S. Ahmed, J.P. Cai, J. F. W. Chan, Y. Sun, D. Jin, H. Chen, T. C. K. Lau,  
432 R. K. H. Kok, W. Li, K. Y. Yuen, P. C. Y. Woo, Receptor Usage of a Novel Bat Lineage C  
433 Betacoronavirus Reveals Evolution of Middle East Respiratory Syndrome-Related  
434 Coronavirus Spike Proteins for Human Dipeptidyl Peptidase 4 Binding. *J. Infect. Dis.*, **218**,  
435 197–207 (2018).

436 33 S. K. Lau, P. C. Woo, K. S. Li, Y. Huang, H. W. Tsoi, B. H. Wong, S. S. Wong, S. Y. Leung, K.  
437 H. Chan, K. Y. Yuen, Severe acute respiratory syndrome coronavirus-like virus in Chinese  
438 horseshoe bats. *Proc. Natl. Acad. Sci. USA*, **102**, 14040–14045 (2005).

439 34 B. Hu, L. P. Zeng, X. L. Yang, X. Y. Ge, W. Zhang, B. Li, J. Z. Xie, X. R. Shen, Y. Z. Zhang, N.  
440 Wang, D. S. Luo, X. S. Zheng, M. N. Wang, P. Daszak, L. F. Wang, J. Cui, Z. L. Shi, Discovery  
441 of a rich gene pool of bat SARS-related coronaviruses provides new insights into the origin  
442 of SARS coronavirus. *PLoS Pathog.*, **13**, e1006698 (2017).

443 35 K. G. Andersen, A. Rambaut, W. I. Lipkin, E. C. Holmes, R. F. Garry, The proximal origin of  
444 SARS-CoV-2. *Nature medicine*: **26**(4):450-452 (2020).

445 36 S. Lee, S. D. Jo, K. Son, I. An, J. Jeong, S. J. Wang, Y. Kim, W. Jheong, J. K. Oem, Genetic  
446 Characteristics of Coronaviruses from Korean Bats in 2016. *Microb. Ecol.*, **75**, 174–182,  
447 (2018).

448 37 P. Teluguntla, P. S. Thenkabail, J. Xiong, M. K. Gumma, C. Giri, C. Milesi, M. Ozdogan, R.  
449 Congalton, J. Tilton, T. R. Sankey, R. Massey, A. Phalke, K. Yadav, Global Cropland Area  
450 Database (GCAD) derived from Remote Sensing in Support of Food Security in the Twenty-  
451 first Century: Current Achievements and Future Possibilities. Chapter 7, Vol. II. Land  
452 Resources: Monitoring, Modelling, and Mapping, Remote Sensing Handbook edited by  
453 Prasad S. Thenkabail (2014).

454 38 M. C. Hansen, P. V. Potapov, R. Moore, M. Hancher, S. Turubanova, A. Tyukavina, D. Thau,  
455 S. V. Stehman, S. J. Goetz, T. R. Loveland, A. Kommareddy, A. V. Egorov, L. Chini, C. O.  
456 Justice, J. R. G. Townshend, High-resolution global maps of 21st-century forest cover  
457 change. *Science*, **342**:850–853 (2013).

458 39 P. Vogt, K. H. Riitters, C. Estreguil, J. Kozak, T. G. Wade, J. D. Wickham, Mapping spatial  
459 patterns with morphological image processing. *Landscape Ecol.* **22**, 171–177 (2007).  
460 40 R. M. Assuncao, M. C. Neves, G. Camara, C. Da Costa Freitas, Efficient Regionalisation  
461 Techniques for Socio-economic Geographical Units using Minimum Spanning Trees.  
462 *International Journal of Geographical Information Science* **20** (7): 797–811 (2006).  
463  
464  
465

466 **Figures main text**

467

468

469

470

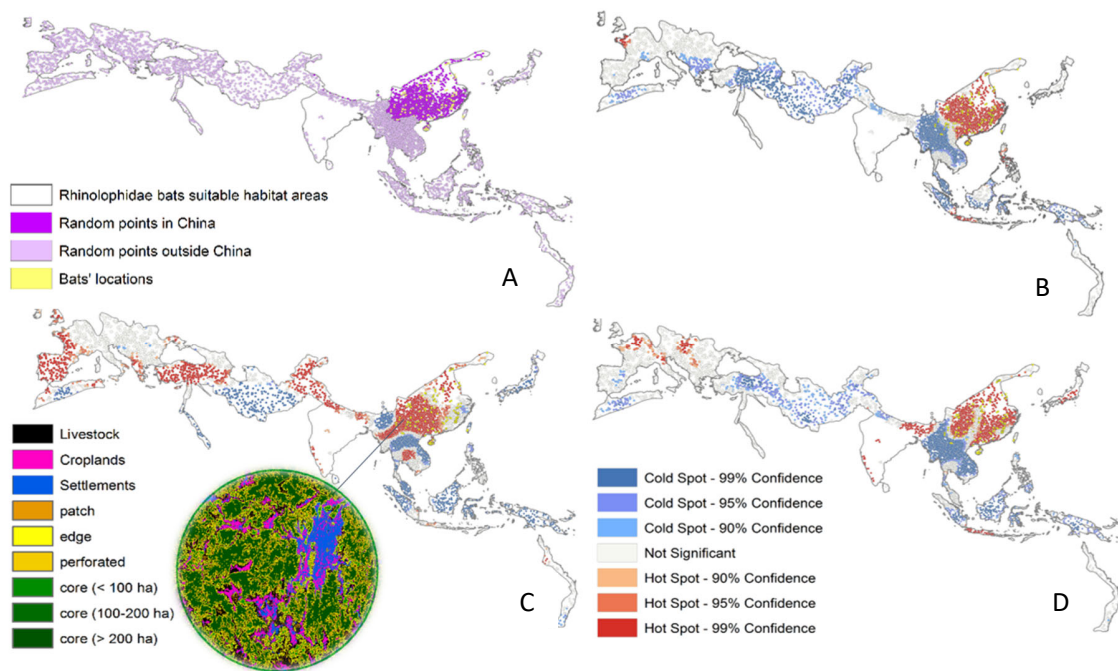

471

472 **Figure 1.** Univariate spatial analysis of coronavirus outbreak drivers (A) Sampling points  
473 randomly generated within China (dark purple) and outside China (light purple) and bat location  
474 points (yellow), weighted by the horseshoe bat species distributions present in East, South &  
475 South East Asia; (B) hotspots (red) and coldspots (blue) of livestock density; (C) hotspots of  
476 forest fragmentation; (D) hotspots of human settlement.

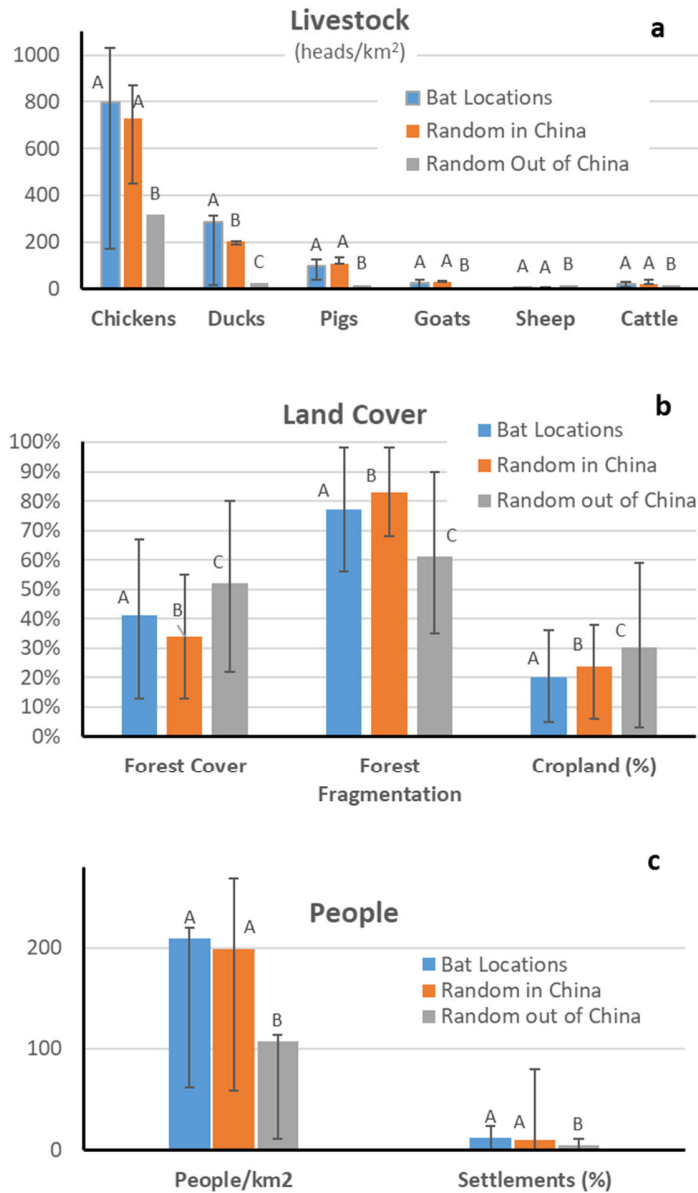

477

478

479 **Figure 2. Distribution comparison for coronavirus outbreak drivers.** Average distributions of  
 480 livestock (A), land cover and use (B), and human population (C) in areas likely suitable for  
 481 horseshoe bat occurrence in China and in the rest of their distribution. Error bars correspond to  
 482 the 20% and 80% percentiles. Different capital letters indicate statistically different means  
 483 ( $\alpha=0.05$ ).

484

485

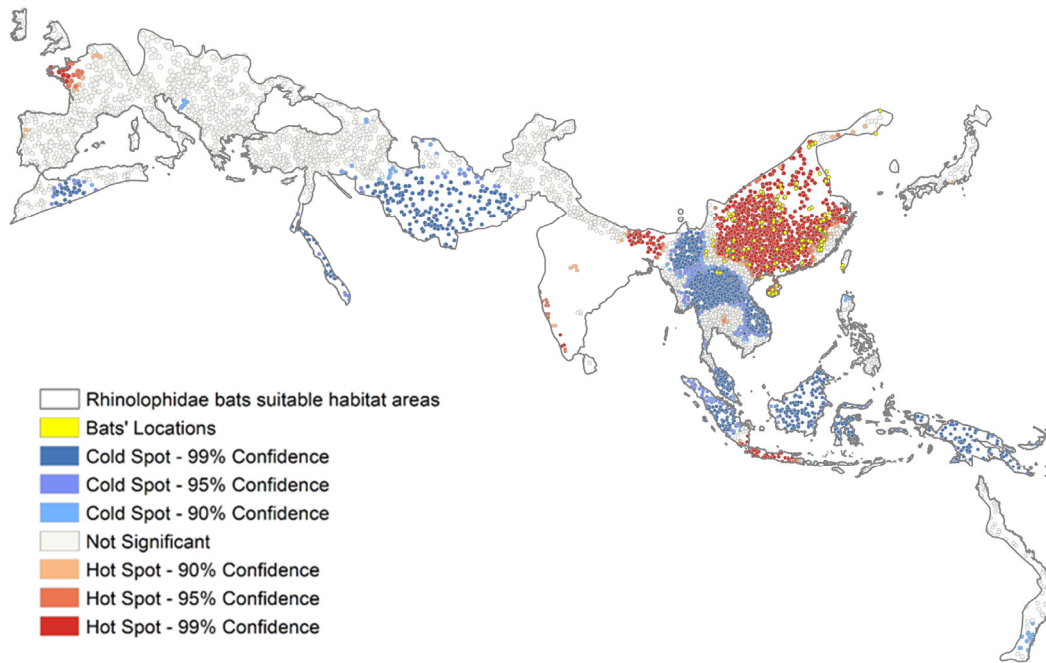

486

487 **Figure 3. Multivariate spatial analysis of coronavirus outbreak drivers.** Hotspot analysis based  
488 on the average  $G_i^*$  Z-Score values for fragmentation, livestock density, and human settlements.  
489 Hotspots are classified based on their significance level.

490

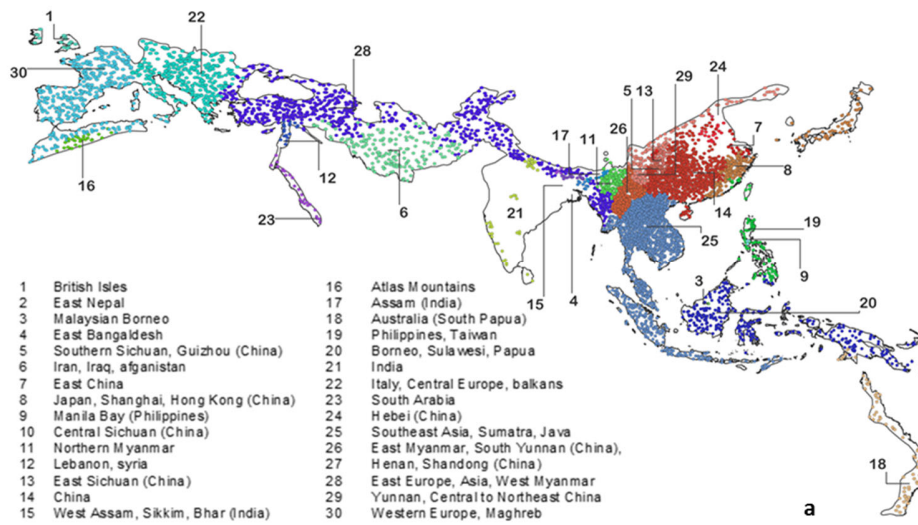

491

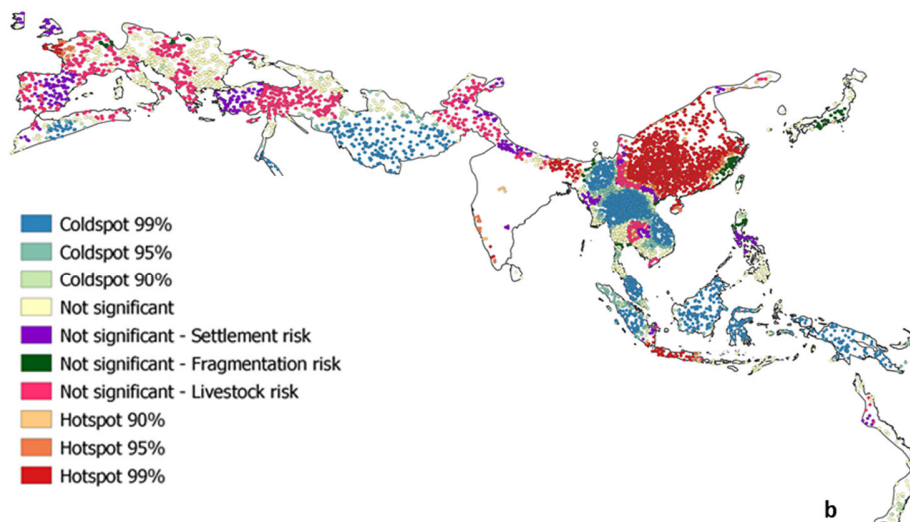

492

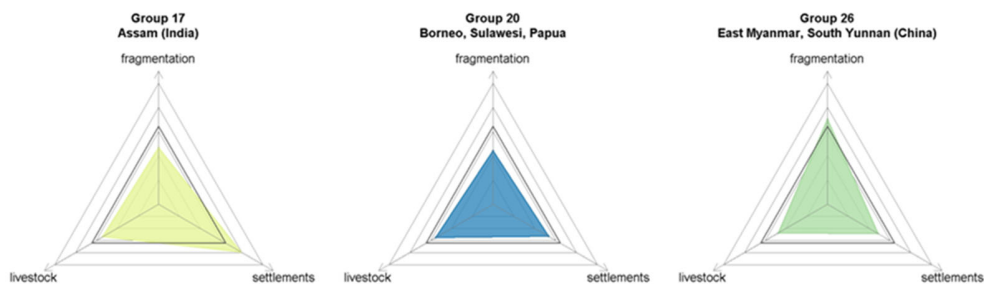

493

494 **Figure 4. Multivariate grouping analysis of coronavirus spillover drivers. (A)** Multivariate groups  
495 analysis based on fragmentation, livestock and settlements attributes; (B) Areas at risk of



496 becoming hotspots as a result of changes in forest fragmentation (green), increase in livestock  
497 density (fuchsia) and human settlement (purple); (C) Possible trajectories of hotspot transition.  
498 These 3 groups represent areas not yet classified as hotspots (*not significant* by Gettis Ord  
499 analysis), but which may change trajectory. The solid triangle represents the safe space of  
500 variation for the 3 indicators (using multivariate Getis-Ord analysis).

501

502

## Supplementary Materials

503

### Environmental Change and Coronavirus Emergence Risk

504 Maria Cristina Rulli<sup>1</sup>, Paolo D'Odorico<sup>2</sup>, Nikolas Galli<sup>1</sup>, David T.S. Hayman<sup>3</sup>505 <sup>1</sup> Department of Civil and Environmental Engineering, Politecnico di Milano, Piazza Leonardo da Vinci,  
506 Milano, Italy507 <sup>2</sup> Department of Environmental Science, Policy, and Management, University of California, Berkeley,  
508 California, USA509 <sup>3</sup> Molecular Epidemiology and Public Health Laboratory, School of Veterinary Science, Massey University,  
510 New Zealand

511

512

513 **Figures and Tables Supplementary Materials (SI)**514 **Table S1.** Horseshoe bat locations based on literature survey of studies reporting occurrences and  
515 related coordinates (coordinates are here listed as reported in the original articles and therefore  
516 they are not in a homogeneous format).

| Species                 | Site          | Location                                     | Region                    | Latitude     | Longitude     | Ref.         |
|-------------------------|---------------|----------------------------------------------|---------------------------|--------------|---------------|--------------|
| <i>R. macrotis</i>      | Shiyan Cave   | Jing gang shan Nature Reserve                | Jiangxi Province          | 26°36'N      | 114°12'E      | <sup>1</sup> |
| <i>R. macrotis</i>      | Xianren Cave  | Jinning County                               | Yunnan Province           | 24°30'N      | 102°20'E      |              |
| <i>R. macrotis</i>      | Tiantang Cave | Changtang County, Nanning city               | Guangxi Province          | 22°49'N      | 108°42'E      |              |
| <i>R. luctus</i>        | Emei shan     | Emei shan                                    | Sichuan province          | 29°31'11"N   | 103°19'57"E   | <sup>2</sup> |
| <i>R. formosae</i>      | Pingtung      | Pingtung                                     | Taiwan                    | 22°40'16"N   | 120°29'17"E   |              |
| <i>R. formosae</i>      | Kaohsiung     | Kaohsiung                                    | Taiwan                    | 23°01'18"N   | 120°39'25"E   |              |
| <i>R. affinis</i>       | Shiyan cave   | Liping village, Jinggangshan Natural Reserve | Jiangxi Province          | 26°36'N      | 114°12'E      | <sup>3</sup> |
| <i>R. pearsoni</i>      | Shiyan cave   | Liping village, Jinggangshan Natural Reserve | Jiangxi Province          | 26°36'N      | 114°12'E      |              |
| <i>R. macrotis</i>      | Longxu cave   | Shuanghe township                            | Yunnan Province           | 24°30'N      | 102°20'E      | <sup>4</sup> |
| <i>R. lepidus</i>       | Longxu cave   | Shuanghe township                            | Yunnan Province           | 24°30'N      | 102°20'E      |              |
| <i>R. sinisus</i>       | Longxu cave   | Shuanghe township                            | Yunnan Province           | 24°30'N      | 102°20'E      |              |
| <i>R. pusillus</i>      | Longxu cave   | Shuanghe township                            | Yunnan Province           | 24°30'N      | 102°20'E      |              |
| <i>R. ferrumequinum</i> | Longxu cave   | Shuanghe township                            | Yunnan Province           | 24°30'N      | 102°20'E      |              |
| <i>R. rex</i>           | Longxu cave   | Shuanghe township                            | Yunnan Province           | 24°30'N      | 102°20'E      |              |
| <i>R. rex</i>           | Qianling Park | Guiyang                                      | Guizhou province          | 26°36'58.0"N | 106°41'26.6"E | <sup>5</sup> |
| <i>R. ferrumequinum</i> | Dalazi Cave   | Zhi'an village, Ji'an city                   | Jilin Province            | 41°3'55.8"N  | 125°50'9.8"E  | <sup>6</sup> |
| <i>R. affinis</i>       |               | Jing Xi County Nature Preserve               | Guangxi Autonomous Region | 23°07'12" N  | 105°57'36" E  | <sup>7</sup> |
| <i>R. affinis</i>       |               | Shiwandashan National Nature Preserve        | Guangxi Autonomous Region | 21°13'48" N  | 107°52'48" E  |              |
| <i>R. pearsonii</i>     |               | Dashahe Nature Preserve                      | Guizhou Province          | 29°10'12" N  | 107°34'12" E  |              |
| <i>R. rouxii</i>        |               | Shiwandashan National Nature Preserve        | Guangxi Autonomous Region | 21°13'48" N  | 107°52'48" E  |              |
| <i>R. rouxii</i>        | Shuipu        | Maolan National Nature Preserve              | Guizhou Province          | 25°29'05" N  | 107°52'54" E  |              |
| <i>R. ferrumequinum</i> |               | Huizhe                                       | Yunnan                    | 26:28:53     | 103:27:06     | <sup>8</sup> |
| <i>R. ferrumequinum</i> |               | Baoxing                                      | Sichuan                   | 30:32:57     | 102:42:38     |              |
| <i>R. ferrumequinum</i> |               | Emei Shan                                    | Sichuan                   | 29:34:74     | 103:16:92     |              |
| <i>R. ferrumequinum</i> |               | Nanton                                       | Sichuan                   | 29:48:33     | 102:13:52     |              |

|                         |               |                                |                            |              |               |               |
|-------------------------|---------------|--------------------------------|----------------------------|--------------|---------------|---------------|
| <i>R. ferrumequinum</i> |               | Baiya                          | Shaanxi                    | 33:21:32     | 108:03:36     |               |
| <i>R. ferrumequinum</i> |               | Foping                         | Shaanxi                    | 33:34:00     | 107:59:00     |               |
| <i>R. ferrumequinum</i> |               | Shuangtai                      | Hubei                      | 32:28:20     | 110:13:32     |               |
| <i>R. ferrumequinum</i> |               | Shuidong                       | Hubei                      | 32:57:56     | 110:25:06     |               |
| <i>R. ferrumequinum</i> |               | Tiangou                        | Hubei                      | 32:25:24     | 110:08:50     |               |
| <i>R. ferrumequinum</i> |               | Shenxian                       | Henan                      | 34:41:49     | 113:22:05     |               |
| <i>R. ferrumequinum</i> |               | Shuanglongwan                  | Henan                      | 33:58:28     | 110:56:57     |               |
| <i>R. ferrumequinum</i> |               | Yingyang                       | Henan                      | 34:01:19     | 113:14:40     |               |
| <i>R. ferrumequinum</i> |               | Zhangjiashan                   | Henan                      | 34:28:29     | 110:48:19     |               |
| <i>R. ferrumequinum</i> |               | Jindezhen                      | Jiangxi                    | 29:19:44     | 117:11:48     |               |
| <i>R. ferrumequinum</i> |               | Wanfu                          | Jiangxi                    | 28:05:47     | 117:01:46     |               |
| <i>R. ferrumequinum</i> |               | Jinzhai                        | Anhui                      | 31:25:05     | 115:44:44     |               |
| <i>R. ferrumequinum</i> |               | Youkuang                       | Anhui                      | 31:10:01     | 115:19:59     |               |
| <i>R. ferrumequinum</i> |               | Changshan                      | Shandong                   | 34:59:37     | 117:58:44     |               |
| <i>R. ferrumequinum</i> |               | Nanzhi                         | Shandong                   | 36:00:08     | 117:00:04     |               |
| <i>R. ferrumequinum</i> |               | Xiaya                          | Shandong                   | 36:15:00     | 118:07:01     |               |
| <i>R. ferrumequinum</i> |               | Yinan                          | Shandong                   | 35:31:06     | 118:24:40     |               |
| <i>R. ferrumequinum</i> |               | Beijing                        | Beijing                    | 39:54:25     | 116:19:55     |               |
| <i>R. ferrumequinum</i> |               | Fangshan                       | Beijing                    | 39:45:54     | 115:58:56     |               |
| <i>R. ferrumequinum</i> |               | Jietai                         | Beijing                    | 39:54:35     | 116:14:55     |               |
| <i>R. ferrumequinum</i> |               | Jilin Shi                      | Jilin                      | 43:46:49     | 126:29:56     |               |
| <i>R. marshalli</i>     | Tiantang Cave | Tiantang village, Nanning city | Guangxi Province           | 4183955.80 N | 12585099.80 E | <sup>9</sup>  |
| <i>R. ferrumequinum</i> |               | Emei Shan                      | Sichuan                    | 29°34'74"N   | 103°16'92"E   | <sup>10</sup> |
| <i>R. ferrumequinum</i> |               | Foping                         | Shaanxi                    | 33°34'00"N   | 107°59'00"E   |               |
| <i>R. ferrumequinum</i> |               | Daguping                       | Shaanxi                    | 33°34'00"N   | 107°46'00"E   |               |
| <i>R. ferrumequinum</i> |               | Beijing                        | Hebei                      | 39°54'25"N   | 116°19'55"E   |               |
| <i>R. ferrumequinum</i> | Fish cave     |                                | Anhui Province             | 30u209N      | 117u509E      | <sup>11</sup> |
| <i>R. sinicus</i>       |               | Qingyang, Anhui                | Qingyang, Anhui            | N30:20:511   | E117:50:128   | <sup>12</sup> |
| <i>R. sinicus</i>       |               | Jingxian, Anhui                | Jingxian, Anhui            | N30:26:785   | E118:24:783   |               |
| <i>R. sinicus</i>       |               | Huashanmiku, Anhui             | Huashanmiku, Anhui         | N29:45:199   | E118:23:331   |               |
| <i>R. sinicus</i>       |               | Sanling mountain, Jiangxi      | Sanling mountain, Jiangxi  | N29:22:112   | E117:34:324   |               |
| <i>R. sinicus</i>       |               | Qingfeng cave, Jiangxi         | Qingfeng cave, Jiangxi     | N29:22:262   | E117:39:357   |               |
| <i>R. sinicus</i>       |               | Qinhui cave, Jiangxi           | Qinhui cave, Jiangxi       | N29:22:662   | E117:32:335   |               |
| <i>R. sinicus</i>       |               | Longhu mountain, Jiangxi       | Longhu mountain, Jiangxi   | N28:04:107   | E116:58:227   |               |
| <i>R. sinicus</i>       |               | Lijia country, Jiangxi         | Lijia country, Jiangxi     | N28:06:726   | E116:59:282   |               |
| <i>R. sinicus</i>       |               | Wuyishan baohuqu, Fujian       | Wuyishan baohuqu, Fujian   | N27:44:000   | E117:40:000   |               |
| <i>R. sinicus</i>       |               | Wuyishan tiliqiao, Fujian      | Wuyishan tiliqiao, Fujian  | N27:44:543   | E117:29:953   |               |
| <i>R. sinicus</i>       |               | Wuyishan Yanzijiao, Fujian     | Wuyishan Yanzijiao, Fujian | N27:48:511   | E117:42:505   |               |
| <i>R. sinicus</i>       |               | Taihe, Jiangxi province        | Taihe, Jiangxi province    | N26:36:151   | E114:12:734   |               |
| <i>R. sinicus</i>       |               | Jinggang mountain, Jiangxi     | Jinggang mountain, Jiangxi | N26:31:215   | E115:06:610   |               |
| <i>R. sinicus</i>       |               | Xingguo, Jiangxi               | Xingguo, Jiangxi           | N26:19:314   | E115:35:229   |               |
| <i>R. sinicus</i>       |               | Taining, Fujian                | Taining, Fujian            | N26:42:236   | E117:29:867   |               |
| <i>R. sinicus</i>       |               | Jiangle, Fujian                | Jiangle, Fujian            | N26:39:537   | E117:34:387   |               |
| <i>R. sinicus</i>       |               | Mingxi, Fujian                 | Mingxi, Fujian             | N26:21:440   | E117:11:398   |               |
| <i>R. sinicus</i>       |               | Yongan, Fujian                 | Yongan, Fujian             | N25:51:500   | E117:17:000   |               |
| <i>R. sinicus</i>       |               | Liancheng, Fujian              | Liancheng, Fujian          | N25:12:404   | E117:15:066   |               |
| <i>R. sinicus</i>       |               | Shanghang, Fujian              | Shanghang, Fujian          | N25:15:020   | E116:49:009   |               |
| <i>R. sinicus</i>       |               | Guilin, Guangxi                | Guilin, Guangxi            | N25:16:278   | E110:17:009   |               |
| <i>R. sinicus</i>       |               | Ruyuan, Guangdong              | Ruyuan, Guangdong          | N24:59:086   | E113:08:523   |               |
| <i>R. sinicus</i>       |               | Luofushan, Guangdong           | Luofushan, Guangdong       | N23:15:589   | E114:03:656   |               |
| <i>R. sinicus</i>       |               | Zhangjiajie, Hunan             | Zhangjiajie, Hunan         | N29:21:410   | E110:34:783   |               |
| <i>R. sinicus</i>       |               | Yongshun, Hunan                | Yongshun, Hunan            | N29:03:720   | E109:38:358   |               |
| <i>R. sinicus</i>       |               | Jishou, Hunan                  | Jishou, Hunan              | N28:18:208   | E109:39:175   |               |
| <i>R. sinicus</i>       |               | Fenghuang, Hunan               | Fenghuang, Hunan           | N27:59:580   | E109:33:786   |               |

|                       |                   |                                                    |                      |            |             |    |
|-----------------------|-------------------|----------------------------------------------------|----------------------|------------|-------------|----|
| <i>R. sinicus</i>     |                   | Wuchuan, Guizhou                                   | Wuchuan, Guizhou     | N28:34:237 | E107:54:058 |    |
| <i>R. sinicus</i>     |                   | Anlong, Guizhou                                    | Anlong, Guizhou      | N25:16:577 | E105:31:931 |    |
| <i>R. sinicus</i>     |                   | Emeishan, Sichuan                                  | Emeishan, Sichuan    | N29:34:803 | E103:24:708 |    |
| <i>R. sinicus</i>     |                   | Huize, Yunnan                                      | Huize, Yunnan        | N26:42:000 | E103:30:000 |    |
| <i>R. sinicus</i>     |                   | Jiuxiang, Yunnan                                   | Jiuxiang, Yunnan     | N25:07:000 | E103:22:000 |    |
| <i>R. sinicus</i>     |                   | Fumin, Yunnan                                      | Fumin, Yunnan        | N25:11:796 | E102:27:863 |    |
| <i>R. sinicus</i>     |                   | Yongde, Yunnan                                     | Yongde, Yunnan       | N24:21:427 | E099:02:161 |    |
| <i>R. sinicus</i>     |                   | Yinggeling, Hainan                                 | Yinggeling, Hainan   | N19:04:982 | E109:33:107 |    |
| <i>R. sinicus</i>     |                   | Wuzhishan, Hainan                                  | Wuzhishan, Hainan    | N18:46:309 | E109:31:012 |    |
| <i>R. sinicus</i>     |                   | Qiongzong, Hainan                                  | Qiongzong, Hainan    | N18:49:589 | E110:00:435 |    |
| <i>R. sinicus</i>     |                   | Baoqing, Hainan                                    | Baoqing, Hainan      | N18:42:237 | E109:41:528 |    |
| <i>R. sinicus</i>     |                   | Lingshui, Hainan                                   | Lingshui, Hainan     | N18:38:586 | E109:57:636 |    |
| <i>R. sinicus</i>     |                   | Jianfengling, Hainan                               | Jianfengling, Hainan | N18:47:275 | E108:57:364 |    |
| <i>R. sinicus</i>     |                   | Maogan, Hainan                                     | Maogan, Hainan       | N18:36:306 | E109:26:776 |    |
| <i>R. affinis</i>     | Shiyan cave       | Liping village, Jinggangshan Natural Reserve       | Jiangxi Province     | 26°36'N    | 114°12'E    | 13 |
| <i>R. pearsoni</i>    | Shiyan cave       | Liping village, Jinggangshan Natural Reserve       | Jiangxi Province     | 26°36'N    | 114°12'E    |    |
| <i>R. macrotis</i>    |                   | Yangchun                                           | Guangdong Province   | 111.94     | 22.44       | 14 |
| <i>R. macrotis</i>    |                   | Shaoguan                                           | Guangdong Province   | 113.56     | 24.77       |    |
| <i>R. macrotis</i>    |                   | Nanning                                            | Guangxi Province     | 108.70     | 22.82       |    |
| <i>R. macrotis</i>    |                   | Lengshuijiang                                      | Hunan Province       | 111.57     | 27.75       |    |
| <i>R. macrotis</i>    |                   | Jiנגgangshan                                       | Jiangxi Province     | 114.20     | 26.60       |    |
| <i>R. macrotis</i>    |                   | Jinning                                            | Jinning              | 102.33     | 24.50       |    |
| <i>R. macrotis</i>    |                   | Yuanjiang                                          | Yunnan Province      | 102.00     | 23.59       |    |
| <i>R. macrotis</i>    |                   | Baoshan                                            | Yunnan Province      | 99.10      | 25.08       |    |
| <i>R. macrotis</i>    |                   | Wulong                                             | Chongqing City       | 107.95     | 29.27       |    |
| <i>R. macrotis</i>    |                   | Yangchun                                           | Guangdong Province   | 111.94     | 22.44       |    |
| <i>R. macrotis</i>    |                   | Xishui                                             | Guizhou Province     | 106.21     | 28.45       |    |
| <i>R. macrotis</i>    |                   | Dazhou                                             | Sichuan Province     | 107.74     | 31.20       |    |
| <i>R. macrotis</i>    |                   | Hanzhong                                           | Shannxi Province     | 107.03     | 32.84       |    |
| <i>R. macrotis</i>    |                   | Xichuan                                            | Henan Province       | 111.55     | 32.87       |    |
| <i>R. macrotis</i>    |                   | Wulong                                             | Chongqing City       | 107.95     | 29.27       |    |
| <i>R. macrotis</i>    |                   | Lengshuijiang                                      | Hunan Province       | 111.57     | 27.75       |    |
| <i>R. macrotis</i>    |                   | Jiנגgangshan                                       | Jiangxi Province     | 114.20     | 26.60       |    |
| <i>R. macrotis</i>    |                   | Ganzhou                                            | Jiangxi Province     | 114.09     | 25.46       |    |
| <i>R. macrotis</i>    |                   | Hanzhong                                           | Shannxi Province     | 107.03     | 32.84       |    |
| <i>R. sinicus</i>     |                   | 10km Mojiang, Zhenyuan, and Ning'er towns, Mojiang | Yunnan Province      |            |             | 15 |
| <i>R. affinis</i>     |                   | 10km Mojiang, Zhenyuan, and Ning'er towns, Mojiang | Yunnan Province      |            |             |    |
| <i>R. schnitzleri</i> | Xiao-dong Cave    | Gengjiaying Commune, Yiliang County, Kunming City  | Yunnan province      | 25°02'N    | 103°14'E    | 16 |
| <i>R. affinis</i>     | Longkong Cave     | Yanshi County                                      | Fujian               | 25°12'N    | 117°15'E    | 17 |
| <i>R. affinis</i>     | Zhuxi Cave        | Shanghang County                                   | Fujian               | 25°10'N    | 116°45'E    |    |
| <i>R. affinis</i>     | Jinkuang Cave     | Liancheng County                                   | Fujian               | 25°39'N    | 116°53'E    |    |
| <i>R. affinis</i>     | Qixian Cave       | Sha County                                         | Fujian               | 26°25'N    | 117°39'E    |    |
| <i>R. affinis</i>     | Guixian Cave      | Mingxi County                                      | Fujian               | 26°24'N    | 117°11'E    |    |
| <i>R. affinis</i>     | Huanghuacong Cave | Yanzijiao Town, Wuyi Mountain                      | Fujian               | 27°49'N    | 117°43'E    |    |
| <i>R. affinis</i>     | Shui Cave         | Longmen County                                     | Guangdong            |            |             |    |
| <i>R. affinis</i>     | Dongbian Cave     | Longmen County                                     | Guangdong            |            |             |    |
| <i>R. affinis</i>     | Penglai Cave      | Yunfu Mount, Bolo County                           | Guangdong            |            |             |    |
| <i>R. affinis</i>     | Fangkong          | Luofu Mountain, Huizhou City                       | Guangdong            | 23°16'N    | 114°04'E    |    |
| <i>R. affinis</i>     | Seven Star Cave   | Guilin City                                        | Guangxi              | 25°17'N    | 110°18'E    |    |

|                         |                               |                                |          |         |          |  |
|-------------------------|-------------------------------|--------------------------------|----------|---------|----------|--|
| <i>R. affinis</i>       | Fenkeng Cave                  | Guilin City                    | Guangxi  | 25°17'N | 110°21'E |  |
| <i>R. affinis</i>       | Seven Star Cave               | Guilin City                    | Guangxi  | 25°17'N | 110°18'E |  |
| <i>R. affinis</i>       | Bianfu Cave                   | Lingshui County                | Hainan   | 18°42'N | 109°53'E |  |
| <i>R. affinis</i>       | Xiashui Cave                  | Qiongzong County               | Hainan   | 19°04'N |          |  |
| <i>R. affinis</i>       | Qianlong Cave                 | Baoting County                 | Hainan   | 18°34'N | 109°26'E |  |
| <i>R. affinis</i>       | Fangkong Cave                 | Yingge Mountain                | Hainan   | 19°04'N | 109°33'E |  |
| <i>R. affinis</i>       | Qishier Cave                  | Huoshan Mountain, Haikou City  | Hainan   | 19°57'N | 110°12'E |  |
| <i>R. affinis</i>       | Bianfu Cave                   | Xixia countryside              | Henan    |         |          |  |
| <i>R. affinis</i>       | Longhushan Park               | Yingtian City                  | Jiangxi  | 28°04'N | 116°58'E |  |
| <i>R. affinis</i>       | Jinuo Town                    | Xishuang banna                 | Yunnan   | 21°58'N | 100°49'E |  |
| <i>R. affinis</i>       |                               | Manfa Village, Xishuang banna  | Yunnan   |         |          |  |
| <i>R. affinis</i>       | Dashu Cave                    | Xishuangbanna                  | Yunnan   |         |          |  |
| <i>R. affinis</i>       | Jiuxiang Cave                 | Yiliang County                 | Yunnan   |         |          |  |
| <i>R. affinis</i>       | Shaft Cave, near Bailong Cave | Mile County                    | Yunnan   | 24°11'N | 103°21'E |  |
| <i>R. ferrumequinum</i> | Bianfu Cave                   | SW of Beijing                  | Beijing  | 39°43'N | 115°43'E |  |
| <i>R. ferrumequinum</i> | Shidu Caves                   | Fangshan District              | Beijing  | 39°25'N | 115°17'E |  |
| <i>R. ferrumequinum</i> | Bianfu Cave                   | SW of Beijing                  | Beijing  | 39°43'N | 115°43'E |  |
| <i>R. ferrumequinum</i> | Bianfu Cave, Beijing          | Bianfu Cave, Beijing           | Beijing  |         |          |  |
| <i>R. ferrumequinum</i> | Guanyin Cave, Jietai Temple   | Fang shan Town                 | Beijing  | 39°48'N | 115°48'E |  |
| <i>R. ferrumequinum</i> | Seven Star Cave               | Guilin City                    | Guangxi  | 25°17'N | 110°18'E |  |
| <i>R. ferrumequinum</i> | Shenxian Cave                 | Huancuigu, Rongyang County     | Henan    | 34°38'N | 113°15'E |  |
| <i>R. ferrumequinum</i> |                               | Shennongjia                    | Henan    | 31°30'N | 110°23'E |  |
| <i>R. ferrumequinum</i> | Sihe Village                  | Langhe Town, Wudang Mountain   | Henan    |         |          |  |
| <i>R. ferrumequinum</i> | Tong mu Village               | Muyu Town, Tanjiawan County    | Henan    | 31°28'N | 110°25'E |  |
| <i>R. ferrumequinum</i> | Wanfu Cave                    | Jing dezhen County             | Jiangxi  | 28°37'N | 116°28'E |  |
| <i>R. ferrumequinum</i> | Juda Lizi Cave                | Zian Village, Jian City        | Jilin    | 41°04'N | 125°50'E |  |
| <i>R. ferrumequinum</i> | Xiaya Cave                    | Yiyuan County                  | Shandong |         |          |  |
| <i>R. ferrumequinum</i> |                               | Nantou Village, Luding County  | Sichuan  | 29°48'N | 102°14'E |  |
| <i>R. ferrumequinum</i> | Dahu Cave                     | Emeishan                       | Sichuan  | 29°35'N | 103°17'E |  |
| <i>R. ferrumequinum</i> | Du Cave                       | Panshan Mountain, Tianjin City | Tianjin  | 25°33'N | 116°60'E |  |
| <i>R. ferrumequinum</i> | Heshang Cave                  | Kunming, Fumin County          | Yunnan   | 25°12'N | 102°28'E |  |
| <i>R. ferrumequinum</i> | Xiaogou Cave                  | Kunming City                   | Yunnan   | 25°04'N | 103°23'E |  |
| <i>R. ferrumequinum</i> | Xiao Cave                     | Yiliang County                 | Yunnan   |         |          |  |
| <i>R. lepidus</i>       | Tianlong Cave                 | Dali County                    | Yunnan   | 25°55'N | 100°05'E |  |
| <i>R. lepidus</i>       | Xiyou Cave                    | Fumin County                   | Yunnan   | 25°09'N | 102°39'E |  |
| <i>R. osgoodi</i>       | Tianlong Cave                 | Dali County                    | Yunnan   | 25°55'N | 100°05'E |  |
| <i>R. osgoodi</i>       | Xiyou Cave                    | Fumin County                   | Yunnan   | 25°09'N | 102°39'E |  |
| <i>R. luctus</i>        | Jiuba Cave                    | Jiangle County                 | Fujian   | 26°43'N | 117°29'E |  |

|                     |                   |                                           |           |         |           |  |
|---------------------|-------------------|-------------------------------------------|-----------|---------|-----------|--|
| <i>R. luctus</i>    | Kangtou Cave      |                                           | Fujian    | 26°40'N | 117°36'E  |  |
| <i>R. luctus</i>    | Xianren Cave      | Shishan Town, Haikou City                 | Hainan    | 19°44'N | 109°37'E, |  |
| <i>R. luctus</i>    | Tangle Cave       | Jishou                                    | Hunan     | 28°18'N | 109°39'E  |  |
| <i>R. macrotis</i>  | Shidu Caves       | Beijing                                   | Beijing   |         |           |  |
| <i>R. macrotis</i>  | Closed Cave       | Ziyuan County                             | Guangxi   |         |           |  |
| <i>R. macrotis</i>  | Yuanfeng Cave     | Qilai County                              | Sichuan   | 30°29'N | 103°24'E  |  |
| <i>R. siamensis</i> | Yinhua Cave       | Jiangle County                            | Fujian    | 26°39'N | 117°34'E  |  |
| <i>R. siamensis</i> | Zhuxi Cave        | Shanghang County                          | Fujian    | 25°10'N | 116°45'E  |  |
| <i>R. siamensis</i> | Ganru Cave        | Liancheng County                          | Fujian    |         |           |  |
| <i>R. siamensis</i> | Yinhua Cave       | Jiangle County                            | Fujian    | 26°39'N | 117°34'E  |  |
| <i>R. siamensis</i> | Seven Star Cave   | Guilin City                               | Guangxi   | 25°17'N | 110°18'E  |  |
| <i>R. siamensis</i> | Closed Cave       | Ziyuan County                             | Guangxi   |         |           |  |
| <i>R. siamensis</i> | Wolong Cave       | Xingyi County                             | Guizhou   | 24°9'N  | 104°53'E  |  |
| <i>R. siamensis</i> | Shanjia Cave      | Anlong County                             | Guizhou   | 25°19'N | 105°05'E  |  |
| <i>R. siamensis</i> | Wanfu Cave        | Jing dezhen County                        | Jiangxi   | 28°37'N | 116°28'E  |  |
| <i>R. siamensis</i> |                   | Manfa Village, Xishuang banna             | Yunnan    |         |           |  |
| <i>R. siamensis</i> | Heshang Cave      | Kunming, Fumin County                     | Yunnan    | 25°12'N | 102°28'E  |  |
| <i>R. marshalli</i> | Baisha Cave       | Guiping County                            | Guangxi   | 23°14'N | 109°54'E  |  |
| <i>R. marshalli</i> | Shepo Cave        | Guiping County                            | Guangxi   | 23°25'N | 110°15'E  |  |
| <i>R. marshalli</i> | Bailong Cave      | Mile County                               | Yunnan    | 24°12'N | 103°14'E  |  |
| <i>R. marshalli</i> | Gulong Cave       | Yuanjiang County                          | Yunnan    | 23°35'N | 101°58'E  |  |
| <i>R. pearsonii</i> | Yulong Cave       | Qingyang County                           | Anhui     | 30°21'N | 117°50'E  |  |
| <i>R. pearsonii</i> | Longkong Cave     | Yanshi County                             | Fujian    | 25°12'N | 117°15'E  |  |
| <i>R. pearsonii</i> | Yuhua Cave        | Jiangle County                            | Fujian    | 26°39'N | 117°35'E  |  |
| <i>R. pearsonii</i> | Bianfu Cave       | Taining City                              | Fujian    | 26°42'N | 117°30'E  |  |
| <i>R. pearsonii</i> | Ganru Cave        | Liancheng County                          | Fujian    |         |           |  |
| <i>R. pearsonii</i> | Guwang Cave       | Wuyi City                                 | Fujian    | 27°42'N | 117°42'E  |  |
| <i>R. pearsonii</i> | Huanghuacong Cave | Yanzijiao Town, Wuyi Mountain             | Fujian    | 27°49'N | 117°43'E  |  |
| <i>R. pearsonii</i> | Shang Cave        | Dafu Village, Meihua Town, Lechang County | Guangdong | 25°09'N | 113°04'E  |  |
| <i>R. pearsonii</i> | Seven Star Cave   | Guilin City                               | Guangxi   | 25°17'N | 110°18'E  |  |
| <i>R. pearsonii</i> | Closed Cave       | Ziyuan County                             | Guangxi   |         |           |  |
| <i>R. pearsonii</i> |                   | Liangjiang Town, Wuming County            | Guangxi   |         |           |  |
| <i>R. pearsonii</i> | Xipo Cave         | Wuchuan County                            | Guizhou   |         |           |  |
| <i>R. pearsonii</i> | Wanfu Cave        | Jing dezhen County                        | Jiangxi   | 28°37'N | 116°28'E  |  |
| <i>R. pearsonii</i> | Bao Zi Cave       | Tian Quan County                          | Sichuan   | 30°10'N | 102°52'E  |  |
| <i>R. pearsonii</i> | Fufeng Cave       | Emeishan                                  | Sichuan   | 29°34'N | 103°25'E  |  |
| <i>R. pearsonii</i> | Jiulao Cave       | Emeishan                                  | Sichuan   | 29°33'N | 109°47'E  |  |
| <i>R. pearsonii</i> | Mingjiu Cave      | Mongzi County                             | Yunnan    |         |           |  |
| <i>R. pearsonii</i> | Pingbian Village  | Mongzi County                             | Yunnan    |         |           |  |
| <i>R. pearsonii</i> | Wangzhangya Cave  | Dawei County                              | Yunnan    |         |           |  |

|                          |                   |                                           |           |         |          |  |
|--------------------------|-------------------|-------------------------------------------|-----------|---------|----------|--|
| <i>R. pearsonii</i>      | Bianfu Cave       | Mengla County                             | Yunnan    | 21°53'N | 101°18'E |  |
| <i>R. yunanensis</i>     | Yulong Cave       | Qingyang County                           | Anhui     | 30°21'N | 117°50'E |  |
| <i>R. yunanensis</i>     | Longkong Cave     | Yanshi County                             | Fujian    | 25°12'N | 117°15'E |  |
| <i>R. yunanensis</i>     | Yuhua Cave        | Jiangle County                            | Fujian    | 26°39'N | 117°35'E |  |
| <i>R. yunanensis</i>     | Bianfu Cave       | Taining City                              | Fujian    | 26°42'N | 117°30'E |  |
| <i>R. yunanensis</i>     | Ganru Cave        | Liancheng County                          | Fujian    |         |          |  |
| <i>R. yunanensis</i>     | Guwang Cave       | Wuyi City                                 | Fujian    | 27°42'N | 117°42'E |  |
| <i>R. yunanensis</i>     | Huanghuacong Cave | Yanzijiao Town, Wuyi Mountain             | Fujian    | 27°49'N | 117°43'E |  |
| <i>R. yunanensis</i>     | Shang Cave        | Dafu Village, Meihua Town, Lechang County | Guangdong | 25°09'N | 113°04'E |  |
| <i>R. yunanensis</i>     | Seven Star Cave   | Guilin City                               | Guangxi   | 25°17'N | 110°18'E |  |
| <i>R. yunanensis</i>     | Closed Cave       | Ziyuan County                             | Guangxi   |         |          |  |
| <i>R. yunanensis</i>     |                   | Liangjiang Town, Wuming County            | Guangxi   |         |          |  |
| <i>R. yunanensis</i>     | Xipo Cave         | Wuchuan County                            | Guizhou   |         |          |  |
| <i>R. yunanensis</i>     | Wanfu Cave        | Jing dezhen County                        | Jiangxi   | 28°37'N | 116°28'E |  |
| <i>R. yunanensis</i>     | Bao Zi Cave       | Tian Quan County                          | Sichuan   | 30°10'N | 102°52'E |  |
| <i>R. yunanensis</i>     | Fufeng Cave       | Emeishan                                  | Sichuan   | 29°34'N | 103°25'E |  |
| <i>R. yunanensis</i>     | Jiulao Cave       | Emeishan                                  | Sichuan   | 29°33'N | 109°47'E |  |
| <i>R. yunanensis</i>     | Mingju Cave       | Mongzi County                             | Yunnan    |         |          |  |
| <i>R. yunanensis</i>     | Pingbian Village  | Mongzi County                             | Yunnan    |         |          |  |
| <i>R. yunanensis</i>     | Wangzhangya Cave  | Dawei County                              | Yunnan    |         |          |  |
| <i>R. yunanensis</i>     | Bianfu Cave       | Mengla County                             | Yunnan    | 21°53'N | 101°18'E |  |
| <i>R. rex</i>            | Dongmen Cave      | Fushui County                             | Guangxi   |         |          |  |
| <i>R. rex</i>            | White Dragon Cave | Guilin City                               | Guangxi   |         |          |  |
| <i>R. rex</i>            | Fenkeng Cave      | Guilin City                               | Guangxi   | 25°17'N | 110°21'E |  |
| <i>R. rex</i>            | Fenkeng Cave      | Guilin City                               | Guangxi   | 25°17'N | 110°21'E |  |
| <i>R. rex</i>            | Xipo Cave         | Wuchuan County                            | Guizhou   |         |          |  |
| <i>R. rex</i>            | Qingxuan Cave     |                                           | Yunnan    | 26°40'N | 100°12'E |  |
| <i>R. rex</i>            | Tianlong Cave     | Dali County                               | Yunnan    | 25°55'N | 100°05'E |  |
| <i>R. rex</i>            | Bianfu Cave       | Yiliang County                            | Yunnan    | 25°04'N | 103°23'E |  |
| <i>R. rex</i>            | Xiyou Cave        | Fumin County                              | Yunnan    | 25°09'N | 102°39'E |  |
| <i>R. rex</i>            | Xiaogou Cave      | Yiliang County                            | Yunnan    |         |          |  |
| <i>R. paradoxolophus</i> | Dongmen Cave      | Fushui County                             | Guangxi   |         |          |  |
| <i>R. paradoxolophus</i> | White Dragon Cave | Guilin City                               | Guangxi   |         |          |  |
| <i>R. paradoxolophus</i> | Fenkeng Cave      | Guilin City                               | Guangxi   | 25°17'N | 110°21'E |  |
| <i>R. paradoxolophus</i> | Fenkeng Cave      | Guilin City                               | Guangxi   | 25°17'N | 110°21'E |  |
| <i>R. paradoxolophus</i> | Xipo Cave         | Wuchuan County                            | Guizhou   |         |          |  |
| <i>R. paradoxolophus</i> | Qingxuan Cave     |                                           | Yunnan    | 26°40'N | 100°12'E |  |
| <i>R. paradoxolophus</i> | Tianlong Cave     | Dali County                               | Yunnan    | 25°55'N | 100°05'E |  |
| <i>R. paradoxolophus</i> | Bianfu Cave       | Yiliang County                            | Yunnan    | 25°04'N | 103°23'E |  |
| <i>R. paradoxolophus</i> | Xiyou Cave        | Fumin County                              | Yunnan    | 25°09'N | 102°39'E |  |

|                          |                          |                                |           |         |          |  |
|--------------------------|--------------------------|--------------------------------|-----------|---------|----------|--|
| <i>R. paradoxolophus</i> | Xiaogou Cave             | Yiliang County                 | Yunnan    |         |          |  |
| <i>R. sinicus</i>        | Yinhua Cave              | Jiangle County                 | Fujian    | 26°39'N | 117°34'E |  |
| <i>R. sinicus</i>        | Bianfu Cave              | Taining City                   | Fujian    | 26°42'N | 117°30'E |  |
| <i>R. sinicus</i>        | Longkong Cave            | Yanshi County                  | Fujian    | 25°12'N | 117°15'E |  |
| <i>R. sinicus</i>        | Mine                     | Buyun Town, Shanghang County   | Fujian    | 25°15'N | 116°50'E |  |
| <i>R. sinicus</i>        | Jinkuang Cave            | Liancheng County               | Fujian    | 25°39'N | 116°53'E |  |
| <i>R. sinicus</i>        | Liuhuang Cave            | Liancheng County               | Fujian    | 25°52'N | 117°17'E |  |
| <i>R. sinicus</i>        | Yuxi Cave                | Mingxi County                  | Fujian    | 26°21'N | 117°11'E |  |
| <i>R. sinicus</i>        | Yinhua Cave              | Jiangle County                 | Fujian    | 26°39'N | 117°34'E |  |
| <i>R. sinicus</i>        | Xing Cave                | Qiliqiao Bridge, Wuyi Mountain | Fujian    | 27°45'N | 117°30'E |  |
| <i>R. sinicus</i>        | Mine, Chang ganzhou Road | Xincun Town, Wuyi City         | Fujian    | 27°37'N | 117°50'E |  |
| <i>R. sinicus</i>        | Huanghuacong Cave        | Yanzijiao Town, Wuyi Mountain  | Fujian    | 27°49'N | 117°43'E |  |
| <i>R. sinicus</i>        | Penglai Cave             | Yunfu Mount, Bolo County       | Guangdong |         |          |  |
| <i>R. sinicus</i>        | Fangkong                 | Luofu Mountain, Huizhou City   | Guangdong | 23°16'N | 114°04'E |  |
| <i>R. sinicus</i>        | Ni Cave                  | Xinyi County                   | Guangdong | 22°20'N | 110°57'E |  |
| <i>R. sinicus</i>        | Shuili Cave              | Xinyi County                   | Guangdong | 22°20'N | 110°58'E |  |
| <i>R. sinicus</i>        | Kiln                     | Xinyi County                   | Guangdong | 22°15'N | 110°60'E |  |
| <i>R. sinicus</i>        | Closed Cave              | Ziyuan County                  | Guangxi   |         |          |  |
| <i>R. sinicus</i>        | Fenkeng Cave             | Guilin City                    | Guangxi   | 25°17'N | 110°21'E |  |
| <i>R. sinicus</i>        | Fenkeng Cave             | Guilin City                    | Guangxi   | 25°17'N | 110°21'E |  |
| <i>R. sinicus</i>        | Shui Cave                | Guilin City                    | Guangxi   |         |          |  |
| <i>R. sinicus</i>        | Jiang Cave               | Jiangkou County                | Guizhou   | 23°25'N | 110°15'E |  |
| <i>R. sinicus</i>        | Xiashui Cave             | Qiongzong County               | Hainan    | 19°04'N |          |  |
| <i>R. sinicus</i>        | Hela Village             | Hongmao Town, Qiongzong County | Hainan    |         |          |  |
| <i>R. sinicus</i>        | Diyi Village             | Five Finger Mountain           | Hainan    |         |          |  |
| <i>R. sinicus</i>        | Fangkong Cave            | Jianfeng Mountain              | Hainan    | 18°54'N | 109°42'E |  |
| <i>R. sinicus</i>        | Cave                     | Yichang City                   | Hubei     |         |          |  |
| <i>R. sinicus</i>        | Longhushan Park          | Yingtang City                  | Jiangxi   | 28°04'N | 116°58'E |  |
| <i>R. sinicus</i>        | Wanfu Cave               | Jing dezhen County             | Jiangxi   | 28°37'N | 116°28'E |  |
| <i>R. sinicus</i>        | Fufeng Cave              | Emeishan                       | Sichuan   | 29°34'N | 103°25'E |  |
| <i>R. sinicus</i>        | Jiulao Cave              | Emeishan                       | Sichuan   | 29°33'N | 109°47'E |  |
| <i>R. sinicus</i>        | Bailong Cave             | Mile County                    | Yunnan    | 24°12'N | 103°14'E |  |
| <i>R. pusillus</i>       | Shidu Caves              | Fangshan District              | Beijing   | 39°25'N | 115°17'E |  |
| <i>R. pusillus</i>       | Sanqing Cave             | Wanglaopu, Fangshan District   | Beijing   | 39°45'N | 115°45'E |  |
| <i>R. pusillus</i>       | Longkong Cave            | Yanshi County                  | Fujian    | 25°12'N | 117°15'E |  |
| <i>R. pusillus</i>       | Yinhua Cave              | Jiangle County                 | Fujian    | 26°39'N | 117°34'E |  |
| <i>R. pusillus</i>       | Jinkuang Cave            | Liancheng County               | Fujian    | 25°39'N | 116°53'E |  |
| <i>R. pusillus</i>       | Ganru Cave               | Liancheng County               | Fujian    |         |          |  |



|                    |                    |                                |           |         |          |  |
|--------------------|--------------------|--------------------------------|-----------|---------|----------|--|
| <i>R. pusillus</i> | Niutongguan Cave   | Liancheng County               | Fujian    | 25°33'N | 116°59'E |  |
| <i>R. pusillus</i> | Chuqi Cave         | Liancheng County               | Fujian    | 25°33'N | 116°60'E |  |
| <i>R. pusillus</i> | Liuhuang Cave      | Liancheng County               | Fujian    | 25°52'N | 117°17'E |  |
| <i>R. pusillus</i> | Qixian Cave        | Sha County                     | Fujian    | 26°25'N | 117°39'E |  |
| <i>R. pusillus</i> | Yinhua Cave        | Jiangle County                 | Fujian    | 26°39'N | 117°34'E |  |
| <i>R. pusillus</i> | Jiuba Cave         | Jiangle County                 | Fujian    | 26°43'N | 117°29'E |  |
| <i>R. pusillus</i> | Cave of the Buddha | Dingushan Forest Eco system,   | Guangdong |         |          |  |
| <i>R. pusillus</i> | Butterfly Cave     | Yunfu Mount                    | Guangdong |         |          |  |
| <i>R. pusillus</i> | Fangkong           | Luofu Mountain, Huizhou City   | Guangdong | 23°16'N | 114°04'E |  |
| <i>R. pusillus</i> | Dianxian Cave      | Xinyi County                   | Guangdong | 22°20'N | 110°57'E |  |
| <i>R. pusillus</i> | Shuili Cave        | Xinyi County                   | Guangdong | 22°20'N | 110°58'E |  |
| <i>R. pusillus</i> | Rock crevice       | Xinyi County                   | Guangdong | 22°15'N | 111°00'E |  |
| <i>R. pusillus</i> | Tongtian Cave      | Xinyi County                   | Guangdong | 22°23'N | 110°72'E |  |
| <i>R. pusillus</i> | Chang Cave         | Xinyi County                   | Guangdong | 22°17'N | 111°02'E |  |
| <i>R. pusillus</i> | Jishui Cave        | Guilin City                    | Guangxi   | 25°17'N | 110°21'E |  |
| <i>R. pusillus</i> | White Dragon Cave  | Guilin City                    | Guangxi   |         |          |  |
| <i>R. pusillus</i> | Seven Star Cave    | Guilin City                    | Guangxi   | 25°17'N | 110°18'E |  |
| <i>R. pusillus</i> | Closed Cave        | Ziyuan County                  | Guangxi   |         |          |  |
| <i>R. pusillus</i> |                    | Liangjiang Town, Wuming County | Guangxi   |         |          |  |
| <i>R. pusillus</i> | Shui Cave          | Guilin City                    | Guangxi   |         |          |  |
| <i>R. pusillus</i> | Shui Cave          | Guilin City                    | Guangxi   |         |          |  |
| <i>R. pusillus</i> | Jishui Cave        | Guilin City                    | Guangxi   | 25°17'N | 110°21'E |  |
| <i>R. pusillus</i> | Seven Star Cave    | Guilin City                    | Guangxi   | 25°17'N | 110°18'E |  |
| <i>R. pusillus</i> | Wulong Cave        | Mashan County                  | Guangxi   |         |          |  |
| <i>R. pusillus</i> | Shanjia Cave       | Anlong County                  | Guizhou   | 25°19'N | 105°05'E |  |
| <i>R. pusillus</i> |                    | Leigong Mountain               | Guizhou   |         |          |  |
| <i>R. pusillus</i> | Fangkong Cave      | Jianfeng Mountain              | Hainan    | 18°54'N | 109°42'E |  |
| <i>R. pusillus</i> |                    | Yichang City                   | Hubei     | 31°09'N | 111°08'E |  |
| <i>R. pusillus</i> | Shenlong Cave      | Yichang                        | Hubei     | 31°21'N | 110°30'E |  |
| <i>R. pusillus</i> | Yeren Cave         | Shennon gjia                   | Hubei     | 31°55'N | 110°44'E |  |
| <i>R. pusillus</i> | Sihe Village       | Langhe Town, Wudang Mountain   | Henan     |         |          |  |
| <i>R. pusillus</i> | Xianren Cave       | Wuhan City                     | Hubei     | 25°53'N | 114°30'E |  |
| <i>R. pusillus</i> | Longhushan Park    | Yingtian City                  | Jiangxi   | 28°04'N | 116°58'E |  |
| <i>R. pusillus</i> | Wanfu Cave         | Jing dezhen County             | Jiangxi   | 28°37'N | 116°28'E |  |
| <i>R. pusillus</i> | Xiaya Cave         | Yiyuan County                  | Shandong  |         |          |  |
| <i>R. pusillus</i> | Mine               | Buyun Town, Shanghang County   | Shandong  | 25°15'N | 116°50'E |  |
| <i>R. pusillus</i> |                    | Yilai Mountain                 | Sichuan   | 30°29'N | 103°24'E |  |
| <i>R. pusillus</i> |                    | Luding County                  | Sichuan   | 29°48'N | 102°14'E |  |
| <i>R. pusillus</i> | Qilai County       | Qilai County                   | Sichuan   |         |          |  |

|                    |                               |                       |        |         |          |  |
|--------------------|-------------------------------|-----------------------|--------|---------|----------|--|
| <i>R. pusillus</i> | Ahei Cave                     | Xishuangbanna         | Yunnan |         |          |  |
| <i>R. pusillus</i> | Heshang Cave                  | Kunming, Fumin County | Yunnan | 25°12'N | 102°28'E |  |
| <i>R. pusillus</i> | Xiangshui Village             | Fumin County          | Yunnan |         |          |  |
| <i>R. pusillus</i> | Wangzhangya Cave              | Dawei County          | Yunnan |         |          |  |
| <i>R. pusillus</i> | Fengjing Cave                 | Jiuxiang County       | Yunnan |         |          |  |
| <i>R. pusillus</i> | Jiuxiang Cave                 | Yiliang County        | Yunnan |         |          |  |
| <i>R. pusillus</i> | Bailong Cave                  | Mile County           | Yunnan | 24°12'N | 103°14'E |  |
| <i>R. pusillus</i> | Shaft Cave, near Bailong Cave | Mile County           | Yunnan | 24°11'N | 103°21'E |  |
| <i>R. stheno</i>   | Ahei Cave                     | Xishuang banna        | Yunnan |         |          |  |
| <i>R. stheno</i>   | Jinuo Cave                    | Xishuang banna        | Yunnan | 21°58'N | 100°49'E |  |

- 517 1 Sun, K.-P. *et al.* A new cryptic species of rhinolophus macrotis (Chiroptera : Rhinolophidae) from Jiangxi  
518 Province, China. *Acta Chiropterologica* **10**, 1-10, doi:10.3161/150811008x331045 (2008).
- 519 2 Volleth, M. *et al.* Comparative chromosomal studies in Rhinolophus formosae and R-luctus from China and  
520 Vietnam: elevation of R-l. lanosus to species rank. *Acta Chiropterologica* **19**, 41-50,  
521 doi:10.3161/15081109acc2017.19.1.003 (2017).
- 522 3 Jiang, T., Lu, G., Sun, K., Luo, J. & Feng, J. Coexistence of Rhinolophus affinis and Rhinolophus pearsoni  
523 revisited. *Acta Theriologica* **58**, 47-53, doi:10.1007/s13364-012-0093-x (2013).
- 524 4 Shi, L.-m., Feng, J., Liu, Y., Ye, G.-x. & Zhu, X. Is food resource partitioning responsible for deviation of  
525 echolocation call frequencies from allometry in Rhinolophus macrotis? *Acta Theriologica* **54**, 371-382,  
526 doi:10.4098/j.at.0001-7051.099.2008 (2009).
- 527 5 He, G. Z. *et al.* Entamoeba histolytica Infections in a King Horseshoe Bat (Rhinolophus rex): A First Case Report.  
528 *Asian Journal of Animal and Veterinary Advances* **6**, 1026-1030, doi:10.3923/ajava.2011.1026.1030 (2011).
- 529 6 Liu, Y., Feng, J., Jiang, Y. L., Wu, L. & Sun, K. P. Vocalization development of greater horseshoe bat, Rhinolophus  
530 ferrumequinum (Rhinolophidae, Chiroptera). *Folia Zoologica* **56**, 126-136 (2007).
- 531 7 Bush, S. E. & Robbins, R. G. New host and locality records for Ixodes simplex Neumann and Ixodes  
532 vespertilionis Koch (Acari: Ixodidae) from bats (Chiroptera: Hipposideridae, Rhinolophidae and  
533 Vespertilionidae) in southern China. *International Journal of Acarology* **38**, 1-5,  
534 doi:10.1080/01647954.2011.569509 (2012).
- 535 8 Flanders, J., Wei, L., Rossiter, S. J. & Zhang, S. Identifying the effects of the Pleistocene on the greater  
536 horseshoe bat, Rhinolophus ferrumequinum, in East Asia using ecological niche modelling and phylogenetic  
537 analyses. *Journal of Biogeography* **38**, 439-452, doi:10.1111/j.1365-2699.2010.02411.x (2011).
- 538 9 Liu, Y., Jiang, T., Berquist, S. & Feng, J. Vocal characters and wing morphology of Rhinolophus marshalli from  
539 Tiantang Cave, Guangxi Province, China. *Mammalia* **73**, 373-376, doi:10.1515/mamm.2009.053 (2009).
- 540 10 Rossiter, S. J., Benda, P., Dietz, C., Zhang, S. & Jones, G. Ranges-wide phylogeography in the greater horseshoe  
541 bat inferred from microsatellites: implications for population history, taxonomy and conservation. *Molecular  
542 Ecology* **16**, 4699-4714, doi:10.1111/j.1365-294X.2007.03546.x (2007).
- 543 11 Lei, M., Dong, D., Mu, S., Pan, Y.-H. & Zhang, S. Comparison of Brain Transcriptome of the Greater Horseshoe  
544 Bats (Rhinolophus ferrumequinum) in Active and Torpid Episodes. *Plos One* **9**,  
545 doi:10.1371/journal.pone.0107746 (2014).
- 546 12 Mao, X., He, G., Zhang, J., Rossiter, S. J. & Zhang, S. Lineage Divergence and Historical Gene Flow in the Chinese  
547 Horseshoe Bat (Rhinolophus sinicus). *Plos One* **8**, doi:10.1371/journal.pone.0056786 (2013).
- 548 13 Jiang, T., Feng, J., Sun, K. & Wang, J. Coexistence of two sympatric and morphologically similar bat species  
549 Rhinolophus affinis and Rhinolophus pearsoni. *Progress in Natural Science-Materials International* **18**, 523-  
550 532, doi:10.1016/j.pnsc.2007.12.005 (2008).
- 551 14 Sun, K. *et al.* The complex evolutionary history of big-eared horseshoe bats (Rhinolophus macrotis complex):  
552 insights from genetic, morphological and acoustic data. *Scientific Reports* **6**, doi:10.1038/srep35417 (2016).
- 553 15 Ge, X.-Y. *et al.* Coexistence of multiple coronaviruses in several bat colonies in an abandoned mineshaft.  
554 *Virologica Sinica* **31**, 31-40, doi:10.1007/s12250-016-3713-9 (2016).
- 555 16 Wu, Y. & Vu Dinh, T. A New Species of Rhinolophus (Chiroptera: Rhinolophidae) from China. *Zoological Science*  
556 **28**, 235-241, doi:10.2108/zsj.28.235 (2011).
- 557 17 Zhang, L. *et al.* Recent surveys of bats (Mammalia: Chiroptera) from China. I. Rhinolophidae and  
558 Hipposideridae. *Acta Chiropterologica* **11**, 71-88, doi:10.3161/150811009x465703 (2009).

559 **Table S2.** Mean land cover and land use attributes (and 20% and 80% percentiles) in the  
560 surroundings (<30km distance) of bat location and randomly selected points (see methods) within  
561 and outside China.

|                                                 | <b>Bat Locations</b> |            |            | <b>Random in China</b> |            |            | <b>Random out China</b> |            |            |
|-------------------------------------------------|----------------------|------------|------------|------------------------|------------|------------|-------------------------|------------|------------|
|                                                 | <i>Mean</i>          | <i>20%</i> | <i>80%</i> | <i>Mean</i>            | <i>20%</i> | <i>80%</i> | <i>Mean</i>             | <i>20%</i> | <i>80%</i> |
| <b>Livestock Density (heads/km<sup>2</sup>)</b> |                      |            |            |                        |            |            |                         |            |            |
| - Chickens                                      | 781                  | 183        | 931        | 703                    | 160        | 841        | 317                     | 15         | 317        |
| - Ducks                                         | 256                  | 18         | 294        | 202                    | 10         | 264        | 26                      | 0          | 16         |
| - Pigs                                          | 99                   | 42         | 163        | 107                    | 43         | 148        | 18                      | 0          | 21         |
| - Goats                                         | 32                   | 0          | 47         | 30                     | 4          | 42         | 8                       | 0          | 9          |
| - Sheep                                         | 5                    | 0          | 0          | 3                      | 0          | 1          | 14                      | 0          | 21         |
| - Cattle                                        | 22                   | 5          | 31         | 22                     | 6          | 32         | 16                      | 2          | 21         |
| <b>Forest Cover (%)</b>                         | 45                   | 19         | 71         | 35                     | 13         | 55         | 52                      | 20         | 80         |
| <b>Forest Fragmentation (°)</b>                 | 73                   | 54         | 96         | 83                     | 68         | 98         | 61                      | 35         | 90         |
| <b>Cropland (°)</b>                             | 20                   | 5          | 36         | 24                     | 6          | 38         | 30                      | 3          | 59         |
| <b>People (cap/km<sup>2</sup>)</b>              | 282                  | 63         | 318        | 199                    | 59         | 270        | 107                     | 12         | 114        |
| <b>Villages/Human Settlements (°)</b>           | 11                   | 3          | 18         | 10                     | 2          | 16         | 4                       | 0          | 5          |

562

563

564 **Table S3.** Report for the spatially constrained multivariate grouping analysis, showing group  
565 numerosity, descriptive statistics and boxplots, in comparison with the global benchmark. The  
566 share is calculated as the ratio of the variable range (min-max) which is occupied by the same  
567 variable in a group. Q1 and Q3 are respectively the first and third quartile, and sd is the standard  
568 deviation. The R2 parameter measures the indicator's performance in grouping the sample, as  
569 relative reduction of the intra-group variability w.r.t. the global sample variability. Variables  
570 include fragmentation (frg), livestock (lst), and settlements (stl). Boxplots are an intuitive tool to  
571 visually recap statistical distributions. The meaning of the elements of boxplots is described in the  
572 figure below. In the report, the first and third quartile are expressed respectively as Q1 and Q3.  
573 The high number of outliers for livestock and settlements is typical for high-skewness  
574 distributions. The boxplots show well how the indicator distributions shift and narrow from the  
575 global dataset to single groups. Although in some the standard deviation of one or more indicators  
576 is higher than the global benchmark, each group can be considered as homogeneous for at least  
577 one parameter.

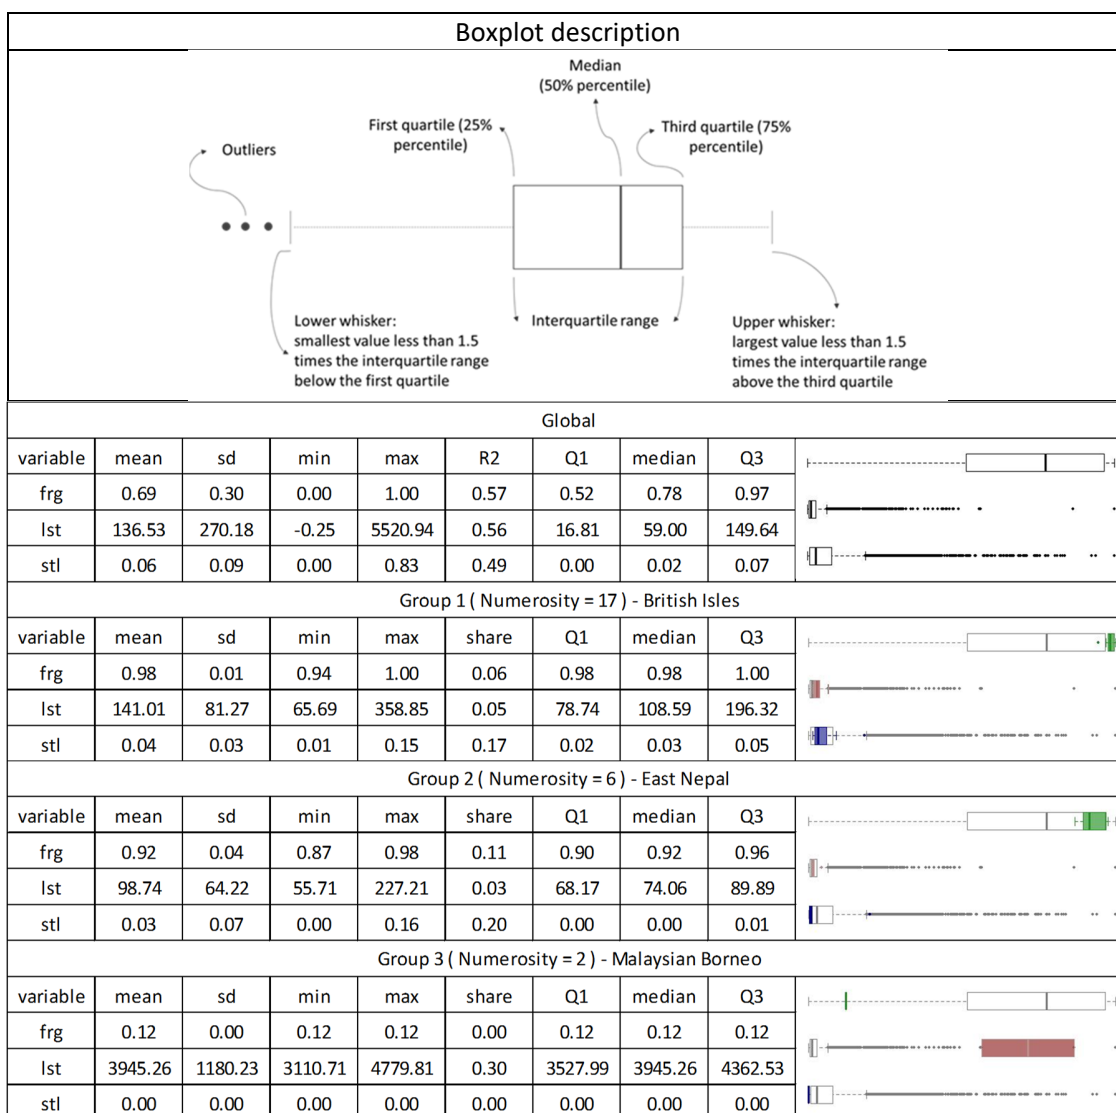

578

| Group 4 ( Numerosity = 9 ) - East Bangladesh                        |         |        |         |         |       |         |         |         |  |
|---------------------------------------------------------------------|---------|--------|---------|---------|-------|---------|---------|---------|--|
| variable                                                            | mean    | sd     | min     | max     | share | Q1      | median  | Q3      |  |
| frg                                                                 | 0.91    | 0.10   | 0.71    | 1.00    | 0.29  | 0.84    | 0.94    | 1.00    |  |
| lst                                                                 | 296.63  | 170.07 | 74.13   | 544.77  | 0.09  | 166.44  | 272.83  | 447.55  |  |
| stl                                                                 | 0.10    | 0.07   | 0.02    | 0.25    | 0.27  | 0.06    | 0.10    | 0.13    |  |
| Group 5 ( Numerosity = 34 ) - Southern Sichuan, Guizhou (China)     |         |        |         |         |       |         |         |         |  |
| variable                                                            | mean    | sd     | min     | max     | share | Q1      | median  | Q3      |  |
| frg                                                                 | 0.75    | 0.18   | 0.45    | 0.97    | 0.52  | 0.59    | 0.80    | 0.91    |  |
| lst                                                                 | 398.06  | 247.72 | 134.08  | 1039.54 | 0.16  | 201.37  | 298.14  | 539.71  |  |
| stl                                                                 | 0.06    | 0.04   | 0.01    | 0.18    | 0.21  | 0.04    | 0.06    | 0.08    |  |
| Group 6 ( Numerosity = 188 ) - Iraq, Iran, Afghanistan              |         |        |         |         |       |         |         |         |  |
| variable                                                            | mean    | sd     | min     | max     | share | Q1      | median  | Q3      |  |
| frg                                                                 | 0.00    | 0.03   | 0.00    | 0.34    | 0.34  | 0.00    | 0.00    | 0.00    |  |
| lst                                                                 | 0.05    | 0.35   | 0.00    | 3.08    | 0.00  | 0.00    | 0.00    | 0.00    |  |
| stl                                                                 | 0.01    | 0.01   | 0.00    | 0.10    | 0.12  | 0.00    | 0.00    | 0.01    |  |
| Group 7 ( Numerosity = 24 ) - East China                            |         |        |         |         |       |         |         |         |  |
| variable                                                            | mean    | sd     | min     | max     | share | Q1      | median  | Q3      |  |
| frg                                                                 | 0.92    | 0.13   | 0.57    | 1.00    | 0.43  | 0.89    | 1.00    | 1.00    |  |
| lst                                                                 | 603.50  | 307.95 | 0.00    | 1398.45 | 0.25  | 418.57  | 546.92  | 736.42  |  |
| stl                                                                 | 0.37    | 0.12   | 0.16    | 0.68    | 0.63  | 0.31    | 0.37    | 0.43    |  |
| Group 8 ( Numerosity = 185 ) - Japan, Shanghai to Hong Kong (China) |         |        |         |         |       |         |         |         |  |
| variable                                                            | mean    | sd     | min     | max     | share | Q1      | median  | Q3      |  |
| frg                                                                 | 0.57    | 0.18   | 0.16    | 1.00    | 0.84  | 0.47    | 0.59    | 0.69    |  |
| lst                                                                 | 189.25  | 108.77 | 16.37   | 631.17  | 0.11  | 110.50  | 163.29  | 257.94  |  |
| stl                                                                 | 0.10    | 0.11   | 0.01    | 0.63    | 0.75  | 0.03    | 0.06    | 0.11    |  |
| Group 9 ( Numerosity = 4 ) - Manila bay (Philippines)               |         |        |         |         |       |         |         |         |  |
| variable                                                            | mean    | sd     | min     | max     | share | Q1      | median  | Q3      |  |
| frg                                                                 | 0.80    | 0.03   | 0.76    | 0.83    | 0.07  | 0.79    | 0.81    | 0.81    |  |
| lst                                                                 | 1469.36 | 307.68 | 1193.82 | 1899.49 | 0.13  | 1286.61 | 1392.07 | 1574.83 |  |
| stl                                                                 | 0.15    | 0.07   | 0.06    | 0.22    | 0.19  | 0.14    | 0.16    | 0.18    |  |
| Group 10 ( Numerosity = 13 ) - Central Sichuan (China)              |         |        |         |         |       |         |         |         |  |
| variable                                                            | mean    | sd     | min     | max     | share | Q1      | median  | Q3      |  |
| frg                                                                 | 0.96    | 0.06   | 0.83    | 1.00    | 0.17  | 0.90    | 1.00    | 1.00    |  |
| lst                                                                 | 2259.48 | 335.99 | 1713.00 | 2720.77 | 0.18  | 1986.94 | 2412.74 | 2489.97 |  |
| stl                                                                 | 0.32    | 0.08   | 0.18    | 0.50    | 0.38  | 0.27    | 0.29    | 0.34    |  |
| Group 11 ( Numerosity = 118 ) - Northern Myanmar                    |         |        |         |         |       |         |         |         |  |
| variable                                                            | mean    | sd     | min     | max     | share | Q1      | median  | Q3      |  |
| frg                                                                 | 0.35    | 0.18   | 0.00    | 1.00    | 1.00  | 0.23    | 0.35    | 0.48    |  |
| lst                                                                 | 26.58   | 23.05  | 0.13    | 152.78  | 0.03  | 9.94    | 19.75   | 38.37   |  |
| stl                                                                 | 0.02    | 0.03   | 0.00    | 0.21    | 0.26  | 0.00    | 0.00    | 0.01    |  |
| Group 12 ( Numerosity = 18 ) - Lebanon, Syria                       |         |        |         |         |       |         |         |         |  |
| variable                                                            | mean    | sd     | min     | max     | share | Q1      | median  | Q3      |  |
| frg                                                                 | 0.80    | 0.38   | 0.00    | 1.00    | 1.00  | 0.88    | 1.00    | 1.00    |  |
| lst                                                                 | 50.82   | 76.73  | 0.00    | 204.68  | 0.04  | 0.00    | 2.57    | 88.93   |  |
| stl                                                                 | 0.06    | 0.04   | 0.01    | 0.16    | 0.19  | 0.03    | 0.06    | 0.08    |  |

| Group 13 ( Numerosity = 41 ) - East Sichuan (China)              |         |        |        |         |       |         |         |         |  |
|------------------------------------------------------------------|---------|--------|--------|---------|-------|---------|---------|---------|--|
| variable                                                         | mean    | sd     | min    | max     | share | Q1      | median  | Q3      |  |
| frg                                                              | 0.97    | 0.08   | 0.71   | 1.00    | 0.29  | 0.99    | 1.00    | 1.00    |  |
| lst                                                              | 1207.95 | 196.18 | 865.09 | 1768.76 | 0.16  | 1063.81 | 1195.58 | 1315.51 |  |
| stl                                                              | 0.19    | 0.07   | 0.06   | 0.40    | 0.41  | 0.14    | 0.17    | 0.23    |  |
| Group 14 ( Numerosity = 732 ) - China                            |         |        |        |         |       |         |         |         |  |
| variable                                                         | mean    | sd     | min    | max     | share | Q1      | median  | Q3      |  |
| frg                                                              | 0.85    | 0.14   | 0.29   | 1.00    | 0.71  | 0.77    | 0.89    | 0.97    |  |
| lst                                                              | 260.33  | 188.99 | 63.54  | 1636.25 | 0.28  | 144.39  | 193.75  | 300.04  |  |
| stl                                                              | 0.11    | 0.09   | 0.00   | 0.64    | 0.77  | 0.04    | 0.08    | 0.14    |  |
| Group 15 ( Numerosity = 14 ) - West Assam, Sikkim, Bihar (India) |         |        |        |         |       |         |         |         |  |
| variable                                                         | mean    | sd     | min    | max     | share | Q1      | median  | Q3      |  |
| frg                                                              | 0.83    | 0.29   | 0.00   | 1.00    | 1.00  | 0.86    | 0.97    | 0.99    |  |
| lst                                                              | 306.08  | 69.22  | 186.08 | 442.16  | 0.05  | 279.78  | 298.44  | 335.38  |  |
| stl                                                              | 0.52    | 0.16   | 0.26   | 0.83    | 0.68  | 0.40    | 0.54    | 0.61    |  |
| Group 16 ( Numerosity = 27 ) - Atlas Mountains                   |         |        |        |         |       |         |         |         |  |
| variable                                                         | mean    | sd     | min    | max     | share | Q1      | median  | Q3      |  |
| frg                                                              | 0.00    | 0.00   | 0.00   | 0.00    | 0.00  | 0.00    | 0.00    | 0.00    |  |
| lst                                                              | 20.45   | 26.97  | 3.17   | 103.64  | 0.02  | 4.84    | 8.10    | 19.57   |  |
| stl                                                              | 0.00    | 0.00   | 0.00   | 0.01    | 0.02  | 0.00    | 0.00    | 0.00    |  |
| Group 17 ( Numerosity = 14 ) - Assam (India)                     |         |        |        |         |       |         |         |         |  |
| variable                                                         | mean    | sd     | min    | max     | share | Q1      | median  | Q3      |  |
| frg                                                              | 0.82    | 0.16   | 0.52   | 0.99    | 0.47  | 0.70    | 0.88    | 0.94    |  |
| lst                                                              | 176.63  | 115.38 | 36.71  | 440.25  | 0.07  | 82.13   | 156.77  | 228.82  |  |
| stl                                                              | 0.47    | 0.16   | 0.27   | 0.77    | 0.60  | 0.31    | 0.48    | 0.59    |  |
| Group 18 ( Numerosity = 69 ) - Australia, South Papua            |         |        |        |         |       |         |         |         |  |
| variable                                                         | mean    | sd     | min    | max     | share | Q1      | median  | Q3      |  |
| frg                                                              | 0.69    | 0.29   | 0.00   | 1.00    | 1.00  | 0.39    | 0.76    | 1.00    |  |
| lst                                                              | 18.32   | 62.87  | 0.00   | 419.57  | 0.08  | 0.00    | 0.65    | 9.82    |  |
| stl                                                              | 0.00    | 0.01   | 0.00   | 0.04    | 0.05  | 0.00    | 0.00    | 0.00    |  |
| Group 19 ( Numerosity = 84 ) - Philippines, Taiwan               |         |        |        |         |       |         |         |         |  |
| variable                                                         | mean    | sd     | min    | max     | share | Q1      | median  | Q3      |  |
| frg                                                              | 0.63    | 0.23   | 0.00   | 1.00    | 1.00  | 0.54    | 0.69    | 0.78    |  |
| lst                                                              | 135.73  | 107.16 | 10.45  | 427.88  | 0.08  | 51.91   | 103.28  | 189.72  |  |
| stl                                                              | 0.03    | 0.05   | 0.00   | 0.22    | 0.26  | 0.01    | 0.02    | 0.03    |  |
| Group 20 ( Numerosity = 294 ) - Borneo, Sulawesi, Papua          |         |        |        |         |       |         |         |         |  |
| variable                                                         | mean    | sd     | min    | max     | share | Q1      | median  | Q3      |  |
| frg                                                              | 0.32    | 0.24   | 0.00   | 0.98    | 0.98  | 0.13    | 0.24    | 0.45    |  |
| lst                                                              | 20.76   | 66.09  | 0.00   | 877.45  | 0.16  | 1.85    | 4.46    | 11.72   |  |
| stl                                                              | 0.01    | 0.01   | 0.00   | 0.09    | 0.11  | 0.00    | 0.00    | 0.00    |  |
| Group 21 ( Numerosity = 39 ) India                               |         |        |        |         |       |         |         |         |  |
| variable                                                         | mean    | sd     | min    | max     | share | Q1      | median  | Q3      |  |
| frg                                                              | 0.85    | 0.25   | 0.00   | 1.00    | 1.00  | 0.73    | 1.00    | 1.00    |  |
| lst                                                              | 69.90   | 42.61  | 12.35  | 239.52  | 0.04  | 41.12   | 66.94   | 85.47   |  |
| stl                                                              | 0.13    | 0.14   | 0.00   | 0.53    | 0.64  | 0.00    | 0.10    | 0.24    |  |

| Group 22 ( Numerosity = 320 ) - Italy, Central Europe, Balkans     |         |        |         |         |       |         |         |         |  |
|--------------------------------------------------------------------|---------|--------|---------|---------|-------|---------|---------|---------|--|
| variable                                                           | mean    | sd     | min     | max     | share | Q1      | median  | Q3      |  |
| frg                                                                | 0.73    | 0.16   | 0.38    | 1.00    | 0.62  | 0.60    | 0.73    | 0.84    |  |
| lst                                                                | 81.91   | 74.65  | 4.53    | 695.83  | 0.13  | 37.22   | 73.12   | 105.16  |  |
| stl                                                                | 0.07    | 0.06   | 0.00    | 0.43    | 0.51  | 0.03    | 0.05    | 0.09    |  |
| Group 23 ( Numerosity = 26 ) - Saudi Arabia                        |         |        |         |         |       |         |         |         |  |
| variable                                                           | mean    | sd     | min     | max     | share | Q1      | median  | Q3      |  |
| frg                                                                | 0.00    | 0.00   | 0.00    | 0.00    | 0.00  | 0.00    | 0.00    | 0.00    |  |
| lst                                                                | 2.09    | 8.76   | -0.25   | 43.76   | 0.01  | 0.00    | 0.00    | 0.00    |  |
| stl                                                                | 0.03    | 0.05   | 0.00    | 0.18    | 0.22  | 0.00    | 0.01    | 0.03    |  |
| Group 24 ( Numerosity = 1 ) - Shijiazhuang (Hebei, China)          |         |        |         |         |       |         |         |         |  |
| variable                                                           | mean    | sd     | min     | max     | share | Q1      | median  | Q3      |  |
| frg                                                                | 1.00    | NA     | 1.00    | 1.00    | 0.00  | 1.00    | 1.00    | 1.00    |  |
| lst                                                                | 3084.02 | NA     | 3084.02 | 3084.02 | 0.00  | 3084.02 | 3084.02 | 3084.02 |  |
| stl                                                                | 0.39    | NA     | 0.39    | 0.39    | 0.00  | 0.39    | 0.39    | 0.39    |  |
| Group 25 ( Numerosity = 1202 ) - Southeast Asia, Sumatra, Java     |         |        |         |         |       |         |         |         |  |
| variable                                                           | mean    | sd     | min     | max     | share | Q1      | median  | Q3      |  |
| frg                                                                | 0.63    | 0.24   | 0.00    | 1.00    | 1.00  | 0.45    | 0.63    | 0.83    |  |
| lst                                                                | 118.12  | 287.24 | 0.00    | 5520.94 | 1.00  | 21.93   | 45.12   | 95.65   |  |
| stl                                                                | 0.03    | 0.07   | 0.00    | 0.69    | 0.83  | 0.00    | 0.01    | 0.04    |  |
| Group 26 ( Numerosity = 283 ) - Easy Myanmar, South Yunnan (China) |         |        |         |         |       |         |         |         |  |
| variable                                                           | mean    | sd     | min     | max     | share | Q1      | median  | Q3      |  |
| frg                                                                | 0.83    | 0.16   | 0.34    | 1.00    | 0.66  | 0.75    | 0.88    | 0.95    |  |
| lst                                                                | 60.25   | 46.74  | 3.56    | 211.33  | 0.04  | 22.65   | 50.62   | 85.02   |  |
| stl                                                                | 0.02    | 0.02   | 0.00    | 0.13    | 0.15  | 0.00    | 0.01    | 0.02    |  |
| Group 27 ( Numerosity = 18 ) - Henan, Shandong (China)             |         |        |         |         |       |         |         |         |  |
| variable                                                           | mean    | sd     | min     | max     | share | Q1      | median  | Q3      |  |
| frg                                                                | 0.99    | 0.03   | 0.91    | 1.00    | 0.09  | 1.00    | 1.00    | 1.00    |  |
| lst                                                                | 1030.48 | 298.09 | 519.25  | 1664.13 | 0.21  | 782.27  | 1045.74 | 1210.37 |  |
| stl                                                                | 0.54    | 0.10   | 0.39    | 0.78    | 0.47  | 0.48    | 0.53    | 0.57    |  |
| Group 28 ( Numerosity = 716 ) - Eastern Europe, Asia, West Myanmar |         |        |         |         |       |         |         |         |  |
| variable                                                           | mean    | sd     | min     | max     | share | Q1      | median  | Q3      |  |
| frg                                                                | 0.87    | 0.23   | 0.00    | 1.00    | 1.00  | 0.82    | 1.00    | 1.00    |  |
| lst                                                                | 49.40   | 105.81 | 0.00    | 1861.40 | 0.34  | 3.04    | 22.39   | 60.20   |  |
| stl                                                                | 0.02    | 0.04   | 0.00    | 0.45    | 0.55  | 0.00    | 0.01    | 0.03    |  |
| Group 29 ( Numerosity = 153 ) - Yunnan, Central to Northeast China |         |        |         |         |       |         |         |         |  |
| variable                                                           | mean    | sd     | min     | max     | share | Q1      | median  | Q3      |  |
| frg                                                                | 0.87    | 0.14   | 0.30    | 1.00    | 0.70  | 0.81    | 0.91    | 0.98    |  |
| lst                                                                | 122.43  | 135.54 | 1.24    | 1137.94 | 0.21  | 35.82   | 104.68  | 147.99  |  |
| stl                                                                | 0.08    | 0.07   | 0.00    | 0.38    | 0.46  | 0.03    | 0.06    | 0.11    |  |
| Group 30 ( Numerosity = 349 ) - Western Europe, Maghreb            |         |        |         |         |       |         |         |         |  |
| variable                                                           | mean    | sd     | min     | max     | share | Q1      | median  | Q3      |  |
| frg                                                                | 0.88    | 0.16   | 0.00    | 1.00    | 1.00  | 0.83    | 0.96    | 1.00    |  |
| lst                                                                | 105.59  | 132.63 | 2.48    | 1040.61 | 0.19  | 34.59   | 64.49   | 125.01  |  |
| stl                                                                | 0.06    | 0.06   | 0.00    | 0.56    | 0.67  | 0.02    | 0.04    | 0.07    |  |

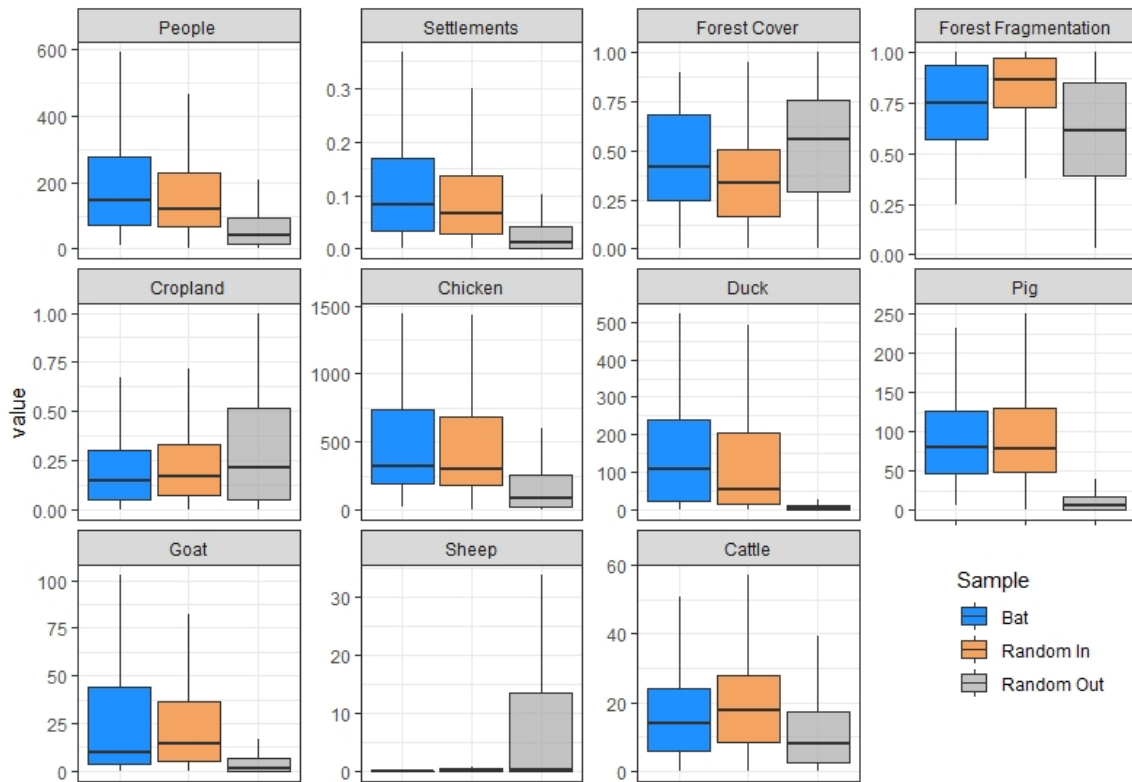

582  
583  
584

**Figure S1.** Boxplots of the distribution data of indicators. In blue are reported data in bat locations, in orange data in China, in grey data outside China.

585  
586



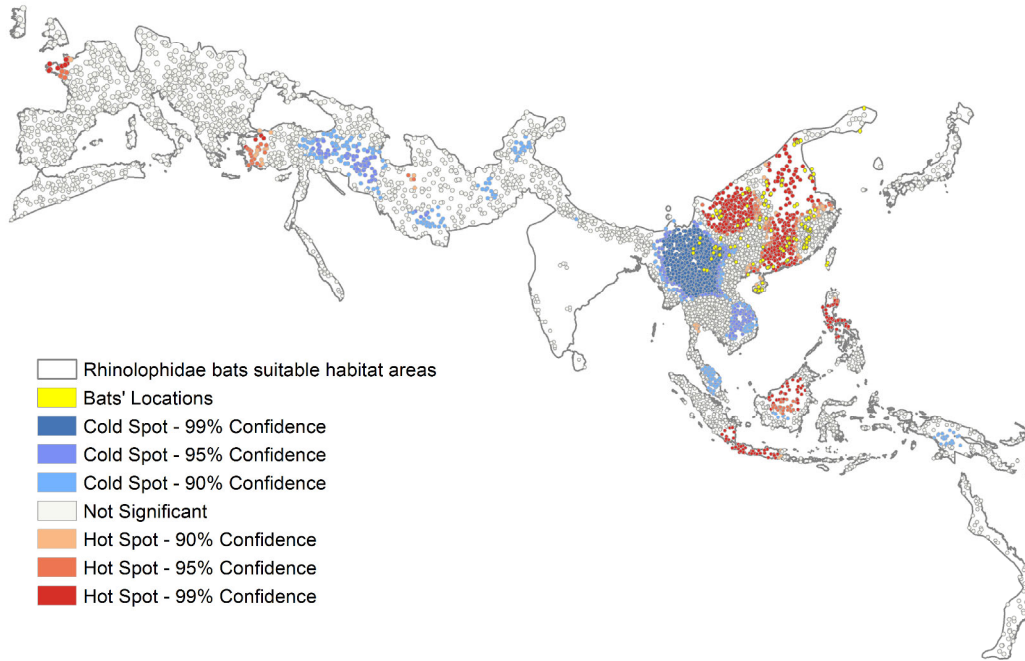

587  
588 **Figure S2.** Hotspots and coldspots of chicken density.

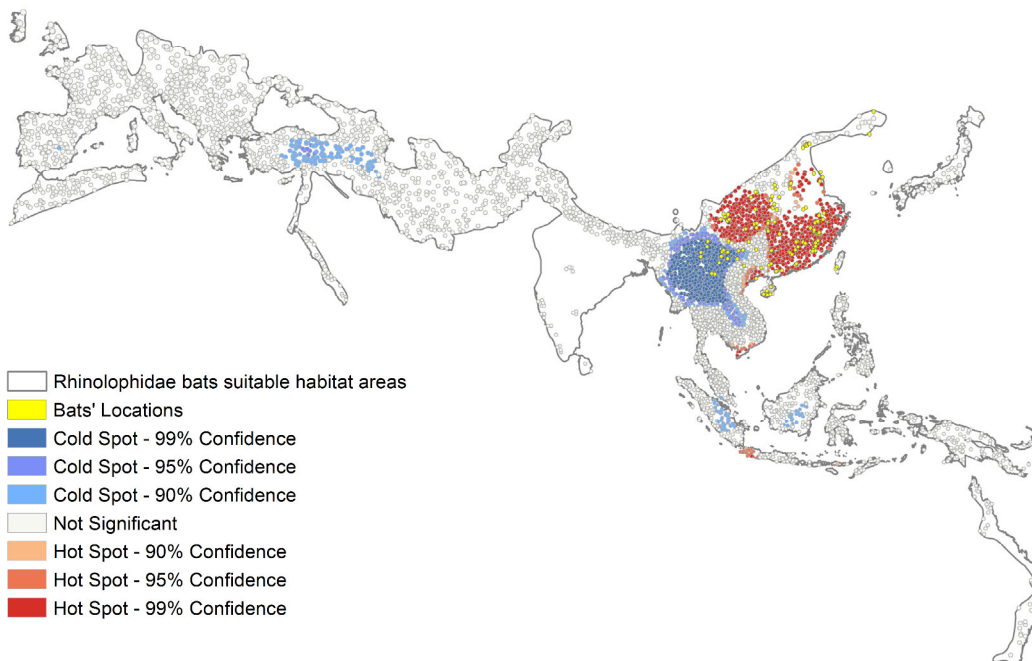

589  
590 **Figure S3.** Hotspots and coldspots of duck density.

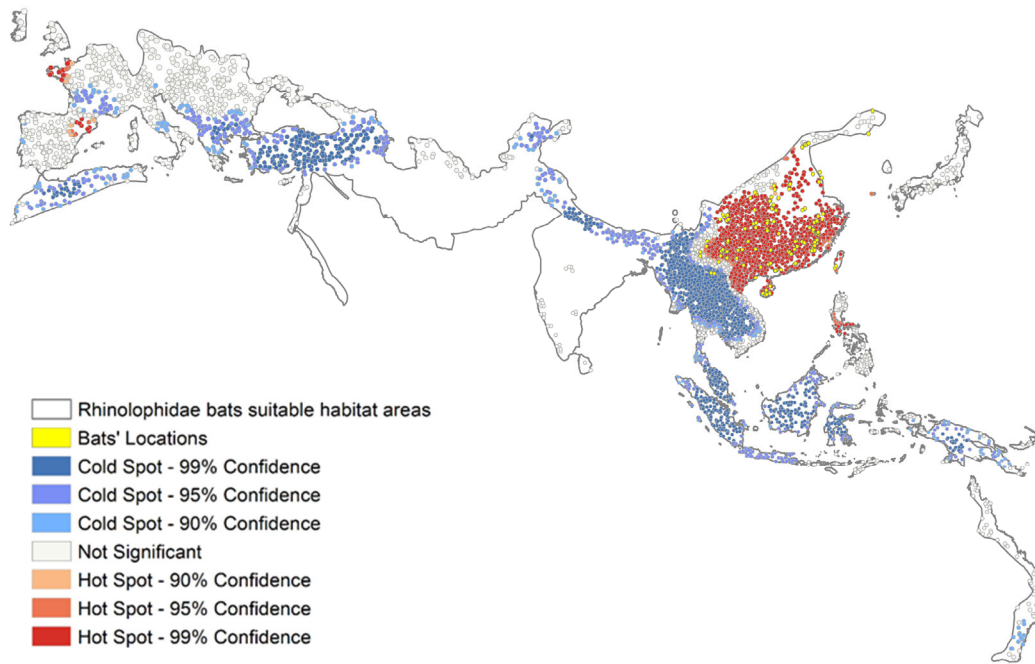

591  
592 **Figure S4.** Hotspots and coldspots of pig density.

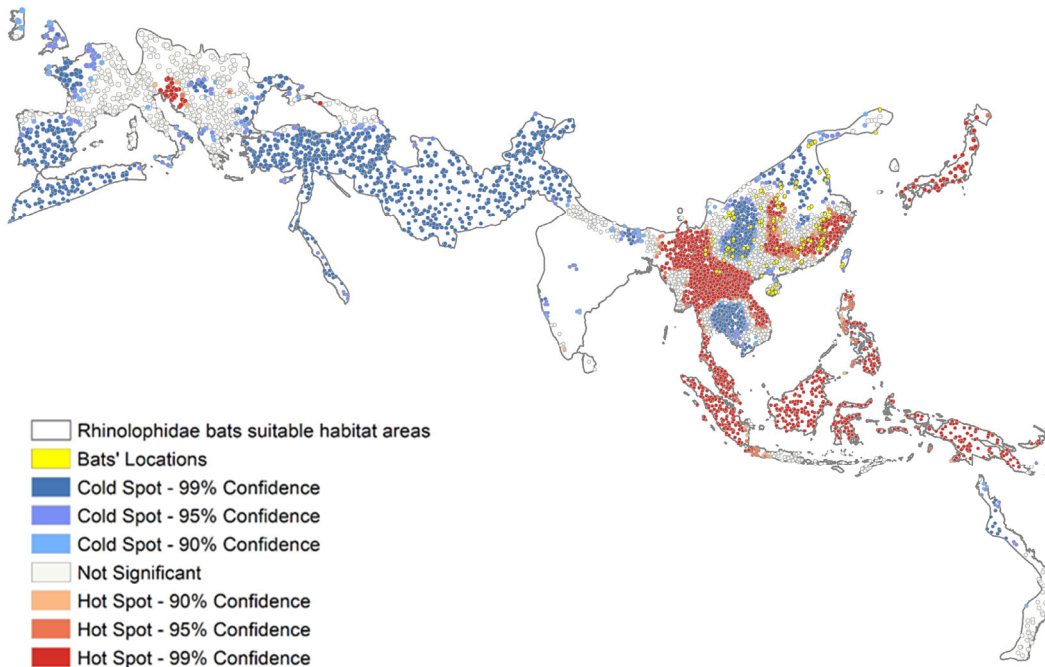

593  
594 **Figure S5.** Hotspots and coldspots of forest cover

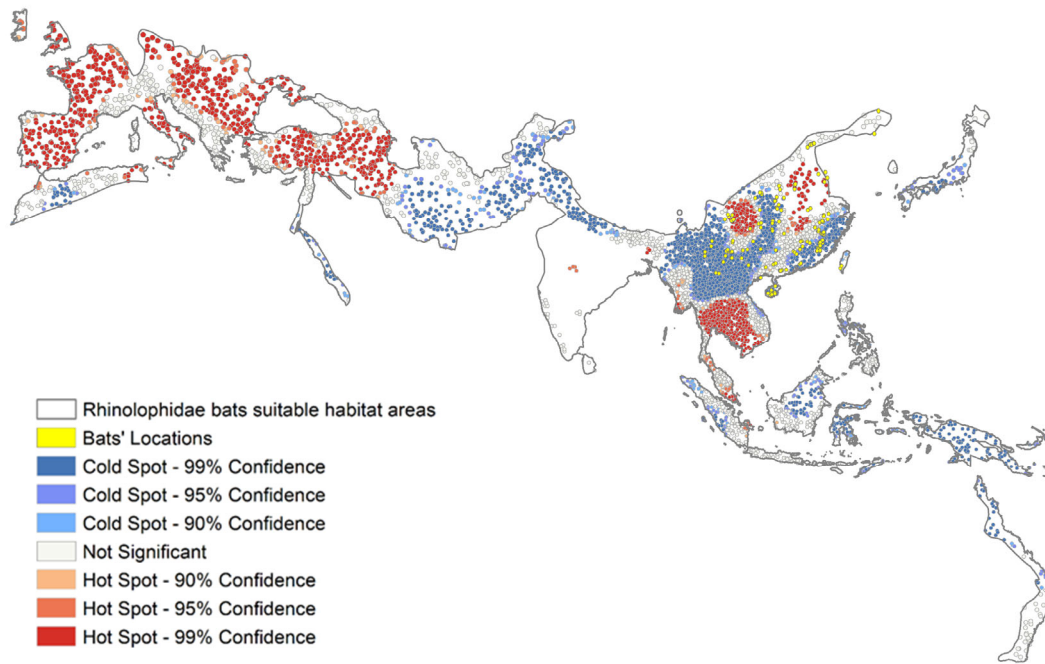

595

596 **Figure S6.** Hotspots and coldspots of cropland cover.

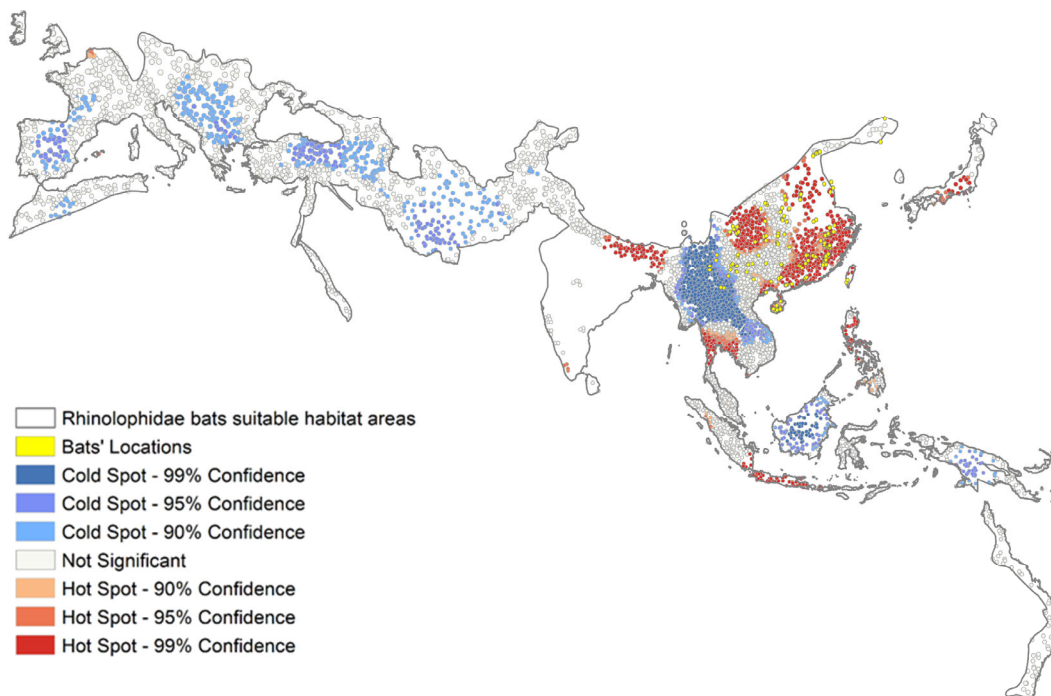

597

598 **Figure S7.** Hotspots and coldspots of population density.

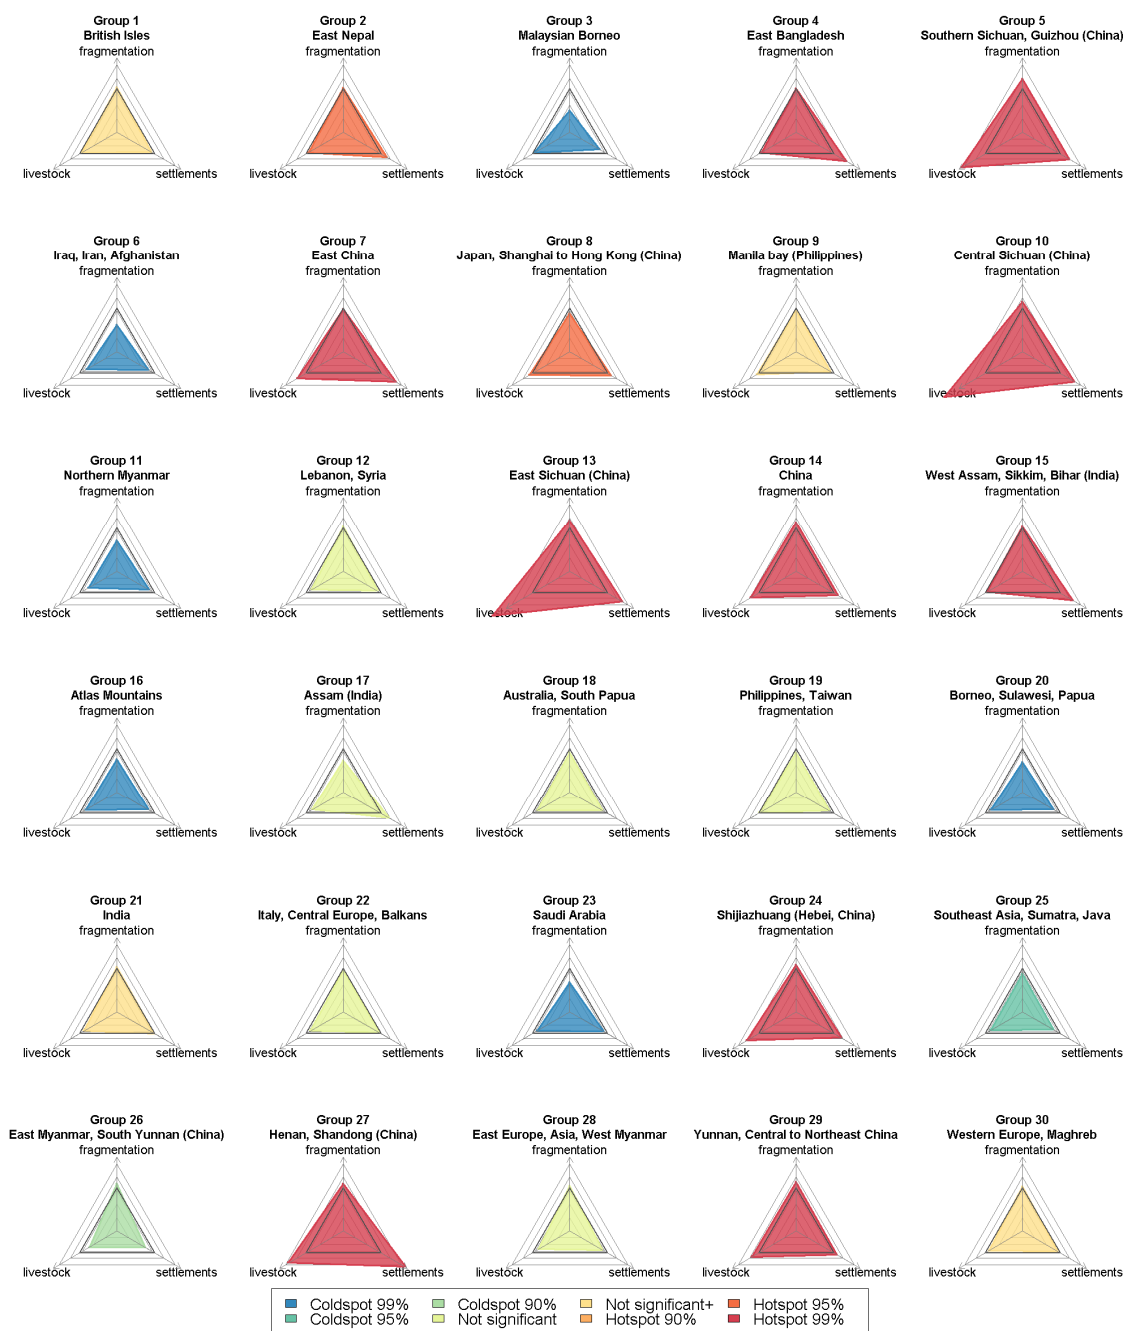

599

600 **Figure S8.** Group analysis. Trajectories of risk.
